1 **Redefining the role of Ca<sup>2+</sup>-permeable channels in photoreceptor degeneration**  
2 **using diltiazem.**

3  
4 Soumyaparna Das<sup>1</sup>, Valerie Popp<sup>2</sup>, Michael Power<sup>1,3</sup>, Kathrin Groeneveld<sup>2,4</sup>, Christian  
5 Melle<sup>4</sup>, Luke Rogerson<sup>3</sup>, Marly Achury<sup>1</sup>, Frank Schwede<sup>5</sup>, Torsten Strasser<sup>1</sup>, Thomas  
6 Euler<sup>1,3</sup>, François Paquet-Durand<sup>1\*</sup> and Vasilica Nache<sup>2\*</sup>

7  
8 <sup>1</sup> Institute for Ophthalmic Research, University of Tübingen, 72076 Tübingen, Germany

9 <sup>2</sup> Institute of Physiology II, University Hospital Jena, Friedrich Schiller University Jena,  
10 07743 Jena, Germany

11 <sup>3</sup> Werner Reichardt Centre for Integrative Neuroscience (CIN), University of Tübingen,  
12 72076 Tübingen, Germany

13 <sup>4</sup> Biomolecular Photonics Group, University Hospital Jena, Friedrich Schiller University  
14 Jena, 07743 Jena, Germany

15  
16 <sup>5</sup> BIOLOG Life Science Institute, 28199 Bremen, Germany

17  
18

19 **Corresponding authors \***

20 François Paquet-Durand

21 Institute for Ophthalmic Research, University of Tübingen, 72076 Tübingen, Germany

22 E-Mail: [francois.paquet-durand@uni-tuebingen.de](mailto:francois.paquet-durand@uni-tuebingen.de)

23

24 Vasilica Nache

25 Institute of Physiology II, University Hospital Jena, Friedrich Schiller University Jena,  
26 07743 Jena, Germany

27 E-Mail: [vasilica.nache@med.uni-jena.de](mailto:vasilica.nache@med.uni-jena.de)

28

29

30

31

32

33 **ABSTRACT**

34 Hereditary degeneration of photoreceptors has been linked to over-activation of  
35  $\text{Ca}^{2+}$ -permeable channels, excessive  $\text{Ca}^{2+}$ -influx, and downstream activation of  $\text{Ca}^{2+}$ -  
36 dependent calpain-type proteases. Unfortunately, after more than 20 years of pertinent  
37 research, unequivocal evidence proving significant and reproducible photoreceptor  
38 protection with  $\text{Ca}^{2+}$ -channel blockers is still lacking. Here, we show that both D- and L-  
39 cis enantiomers of the anti-hypertensive drug diltiazem were very effective at blocking  
40 photoreceptor  $\text{Ca}^{2+}$ -influx, most probably by blocking the pore of  $\text{Ca}^{2+}$ -permeable  
41 channels. Yet, unexpectedly, this block neither reduced the activity of calpain-type  
42 proteases, nor did it result in photoreceptor protection. Remarkably, application of the  
43 L-cis enantiomer of diltiazem even led to a strong increase in photoreceptor cell death.  
44 These findings shed doubt on the previously proposed links between  $\text{Ca}^{2+}$  and retinal  
45 degeneration and are highly relevant for future therapy development as they may serve  
46 to refocus research efforts towards alternative,  $\text{Ca}^{2+}$ -independent degenerative  
47 mechanisms.

48

49 **Running title:** Diltiazem in photoreceptor degeneration

## 50 I. INTRODUCTION

51 In the retina rod photoreceptors respond to dim light and enable night-time vision,  
52 whereas cone photoreceptors respond to bright daylight and enable colour vision.  
53 *Retinitis pigmentosa* (RP) is a group of hereditary diseases where rod primary  
54 degeneration is followed by secondary cone loss, ultimately leading to blindness (1, 2).  
55 *Achromatopsia* (ACHM) is a related disease where a genetic defect causes cone  
56 degeneration without significant rod loss (3). Regrettably, most cases of RP/ACHM  
57 remain without effective treatment, even though photoreceptor death has been linked to  
58 overactivation of Ca<sup>2+</sup>-permeable channels (4, 5).

59 Phototransduction in rods and cones intricately links Ca<sup>2+</sup>- and cGMP-signalling.  
60 cGMP levels are regulated by guanylyl cyclase, producing cGMP, and  
61 phosphodiesterase-6 (PDE6), hydrolysing cGMP. In darkness, cGMP opens the cyclic  
62 nucleotide-gated channel (CNGC), located in the photoreceptor outer segment (OS),  
63 causing influx of Ca<sup>2+</sup> and Na<sup>+</sup> (6). This influx is countered by the Na<sup>+</sup>-Ca<sup>2+</sup>-K<sup>+</sup>-  
64 exchanger (NCKX) in the OS and by the ATP-driven Na<sup>+</sup>-K<sup>+</sup>-exchanger (NKX) in the  
65 photoreceptor inner segment (IS) (6). As a result, the cell is depolarized at  
66 approximately -35 mV (7). The consequent activation of Ca<sub>v</sub>1.4 (L-type) voltage-gated  
67 Ca<sup>2+</sup>-channels (VGCCs), located in the cell body and synapse, mediates further Ca<sup>2+</sup>  
68 influx and synaptic glutamate release (7, 8). In light, PDE6 rapidly hydrolyses cGMP,  
69 leading to CNGC closure, Ca<sup>2+</sup> decrease, and photoreceptor hyperpolarization.  
70 Subsequently, VGCC closes, ending synaptic neurotransmitter release.

71 Loss-of-function mutations in PDE6 lead to cGMP accumulation and CNGC  
72 overactivation, which may result in an abnormally strong influx of Ca<sup>2+</sup> into  
73 photoreceptor OSs (9, 10) and sustained activation of VGCCs, mediating even more  
74 Ca<sup>2+</sup> influx (11). In RP animal models, such as in the *Pde6b* mutant *rd1* and *rd10* mice  
75 (12), excessive Ca<sup>2+</sup> is thought to lead to high activity of Ca<sup>2+</sup>-dependent calpain-type  
76 proteases and photoreceptor death (13, 14). In *rd1* animals the roles of CNGC and  
77 VGCC in photoreceptor cell death were studied by crossbreeding with knockouts (KO)  
78 of either CNGC (*Cngb1*<sup>-/-</sup>) or VGCC (*Cacna1f*<sup>-/-</sup>). While, VGCC KO did not influence *rd1*  
79 degeneration (15), CNGC KO strongly delayed *rd1* photoreceptor loss (16), highlighting  
80 CNGC as a target for pharmacological intervention.

81 Many studies over the past two decades have assessed the protective potential of  
82 Ca<sup>2+</sup>-channel blockers in photoreceptor degeneration (reviewed in (5)). The anti-  
83 hypertensive drug diltiazem is particularly interesting because its D-cis enantiomer

84 blocks mostly VGCCs, while the L-cis enantiomer acts more strongly on CNGCs (17,  
85 18). Both D- and L-cis-diltiazem have been suggested to delay *rd1* photoreceptor  
86 degeneration (11, 19, 20). However, other studies reported conflicting or contradictory  
87 results (21-23).

88 Here, we assessed the effect of D- and L-cis-diltiazem on heterologously expressed  
89 rod and cone CNGCs. We show that L-cis-diltiazem efficiently reduces rod CNGC  
90 activity in a voltage- and cGMP-dependent manner, most probably by obstructing its  
91 conductive pore. Surprisingly, in retinal cultures, derived from *rd1* and *rd10* mice,  
92 neither D- nor L-cis-diltiazem prevented photoreceptor degeneration. Rather, CNGC  
93 inhibition with L-cis-diltiazem exacerbated photoreceptor loss. Together, our results  
94 indicate that CNGC or VGCC inhibition effectively reduces photoreceptor  $Ca^{2+}$  levels,  
95 however, this will not decrease, but may instead increase, photoreceptor degeneration.

96

## 97 **II. RESULTS**

### 98 **Differential effects of D- and L-cis-diltiazem on photoreceptor CNGC**

99 To assess the effects of D- and L-cis-diltiazem on retinal CNGCs, we expressed the  
100 heterotetrameric rod CNGA1:B1a- and cone CNGA3:B3-channels in *Xenopus laevis*  
101 oocytes and examined their functional characteristics using electrophysiological  
102 recordings. We first confirmed correct assembly of heterotetrameric CNGC in the  
103 oocyte plasma membrane: (1) Co-expression of the main subunits, rod CNGA1 and  
104 cone CNGA3, with their modulatory subunits, CNGB1a and CNGB3, respectively, led  
105 to a strong increase of cAMP efficacy in heterotetrameric vs. homotetrameric channels  
106 (24, 25) (Fig. S1a,b). (2) Expression of CNGCs containing GFP-labelled CNGB1a or  
107 CNGB3 subunits and staining the oocyte membrane with fluorescently-labelled lectin  
108 (AlexaFluor™633-WGA) demonstrated plasma membrane localization of  
109 heterotetrameric channels (Fig. S1b,e).

110 We measured next the CNGC concentration-activation relationships in the presence  
111 of cGMP (Table S1; Fig. S1c,f). Under physiological conditions, at -35 mV and with up  
112 to 5  $\mu$ M cGMP (26), CNGC activity reached ~6 % of its maximum for cones and ~1 %  
113 for rods (Fig. 1a-d). When applied to the intracellular side of the membrane, neither D-  
114 nor L-cis-diltiazem (up to 100  $\mu$ M) significantly influenced physiological CNGC activity  
115 (Fig. 1, Table S2). In the presence of saturating cGMP (3 mM), both diltiazem  
116 enantiomers inhibited cone and rod CNGCs (grey areas in Fig. 1a-d). The strongest  
117 effect on both CNGC isoforms was triggered by L-cis-diltiazem, while rod CNGC was  
118 most sensitive to both D- and L-cis-diltiazem (Fig. 1e, Table S2). With pathologically  
119 high cGMP (100  $\mu$ M), emulating RP-like conditions, the diltiazem effect on rod CNGCs,  
120 mirrored closely our observations in the presence of 3 mM cGMP (Fig. 1e,f).

121 Both diltiazem enantiomers (at 100  $\mu$ M) showed a stronger inhibitory effect at  
122 depolarizing (+100 mV) than at hyperpolarizing (-100mV) membrane voltages: for D-  
123 cis-diltiazem by a factor of ~4 and ~7, and for L-cis-diltiazem by a factor of ~2.6 and  
124 ~1.4 in case of cone and rod CNGC, respectively (Fig. S2 and S3). In addition, we  
125 observed a voltage-dependent increase of the  $EC_{50}$ -values with a maximum at +100  
126 mV and a systematic decrease of the  $H$ -values at all tested voltages (Table S1 and S3,  
127 Fig. S2 and S3c,d). D- and L-cis-diltiazem showed similar effects on  $EC_{50}$ - and  $H$ -  
128 values, suggesting that both diltiazem enantiomers reduced the CNGC apparent affinity  
129 and the cooperativity between their subunits through a similar mechanism.

130 In conclusion, (1) under physiological conditions, neither D- nor L-cis-diltiazem affect

131 CNGC activity; (2) at saturating cGMP-concentration, diltiazem had a differential  
132 voltage-dependent effect, with a stronger inhibition of rod- vs. cone-CNGCs, the effect  
133 of L- exceeding that of D-cis-diltiazem, and with maximal inhibition at depolarizing  
134 voltages.

### 135 **Influence of D- and L-cis-diltiazem on CNGC gating kinetics**

136 We then studied the influence of diltiazem on CNGC gating kinetics (Fig. 2a,b).  
137 When applying cGMP and diltiazem simultaneously, the inhibition occurred only after  
138 channel activation, suggesting that diltiazem blocked open channels only. When cGMP  
139 and diltiazem were simultaneously removed, the channel deactivation was considerably  
140 delayed, indicating that diltiazem hindered channel closure.

141 The activation time course of rod and cone CNGCs ( $\tau_{act}$ ) seemed unaffected by  
142 diltiazem, whereas the channel's deactivation ( $\tau_{deact}$ ) was delayed and slowed down by  
143 a factor of  $\sim 2$  (Fig. 2c, Table S4). Also, the kinetics of the blocking event was similar for  
144 both channel isoforms ( $\tau_{block}$ ). This suggested a common blocking mechanism for D-  
145 and L-cis-diltiazem, possibly by obstructing the CNGC pore. We next tested whether  
146 the observed diltiazem-induced block was  $Ca^{2+}$ -dependent (27, 28). In the presence of  
147 extracellular  $Ca^{2+}$  (1 mM  $CaCl_2$ ) we found a reduced cGMP-triggered activation of  
148 CNGCs (Fig. S4a), an effect that was consistent with a very slow  $Ca^{2+}$  permeation (29).  
149 Nevertheless, the influence of  $Ca^{2+}$  on the strength of the L-cis-diltiazem-induced block  
150 was only minor (Fig. S4b), indicating that  $Ca^{2+}$  did not prevent diltiazem binding to its  
151 binding pocket.

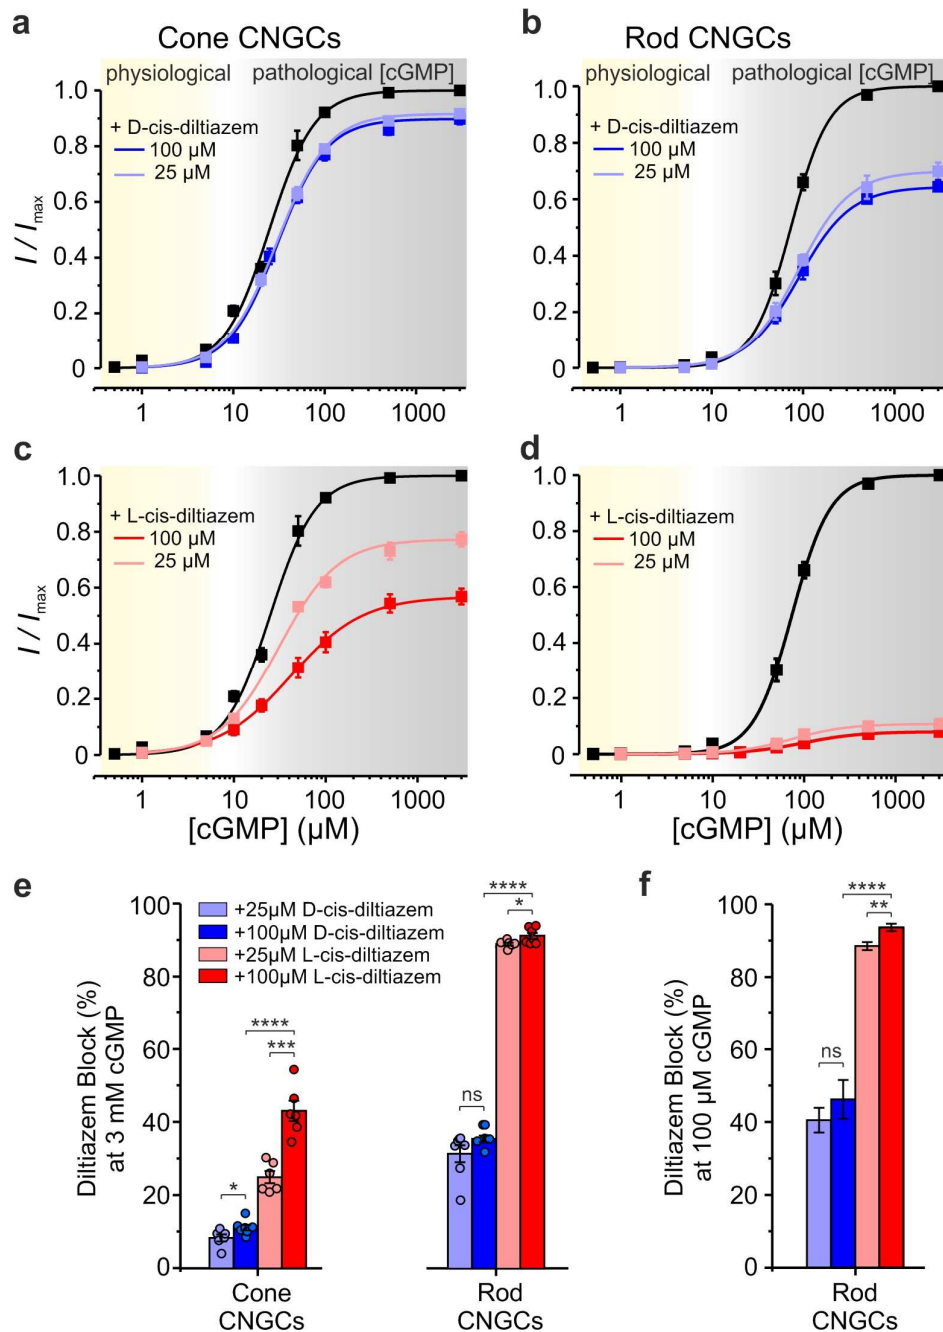

152

153

154

155

156

157

158

159

160

161

162

163

164

165

**Figure 1: Effects of D- and L-cis-diltiazem on rod and cone CNGC activity.** (a-d) Concentration-activation relationships for heterotetrameric cone (a, c) and rod (b, d) CNGCs in the presence of either 100 μM or 25 μM D- or L-cis-diltiazem, respectively, measured at -35 mV. The respective curves represent fits of the experimental data points with the Hill equation (Eq. 1). Black symbols show the normalized cGMP-triggered current amplitudes in the absence of diltiazem and are shown to point out the effect of the blocker. Light- and dark-blue symbols represent data obtained in the presence of D-cis-diltiazem, at 25 and 100 μM, respectively (a, b). Light- and dark-red symbols represent data obtained in the presence of L-cis-diltiazem at 25 and 100 μM, respectively (c, d). (e, f) D- and L-cis-diltiazem - block (%), ±SEM) of CNGCs in the presence of 3 mM (e) and 100 μM cGMP (f), respectively. The amount of diltiazem block was calculated using Eq. 2 (see Materials and Methods). The respective symbols represent single measurements (see also Table S1 and S2).

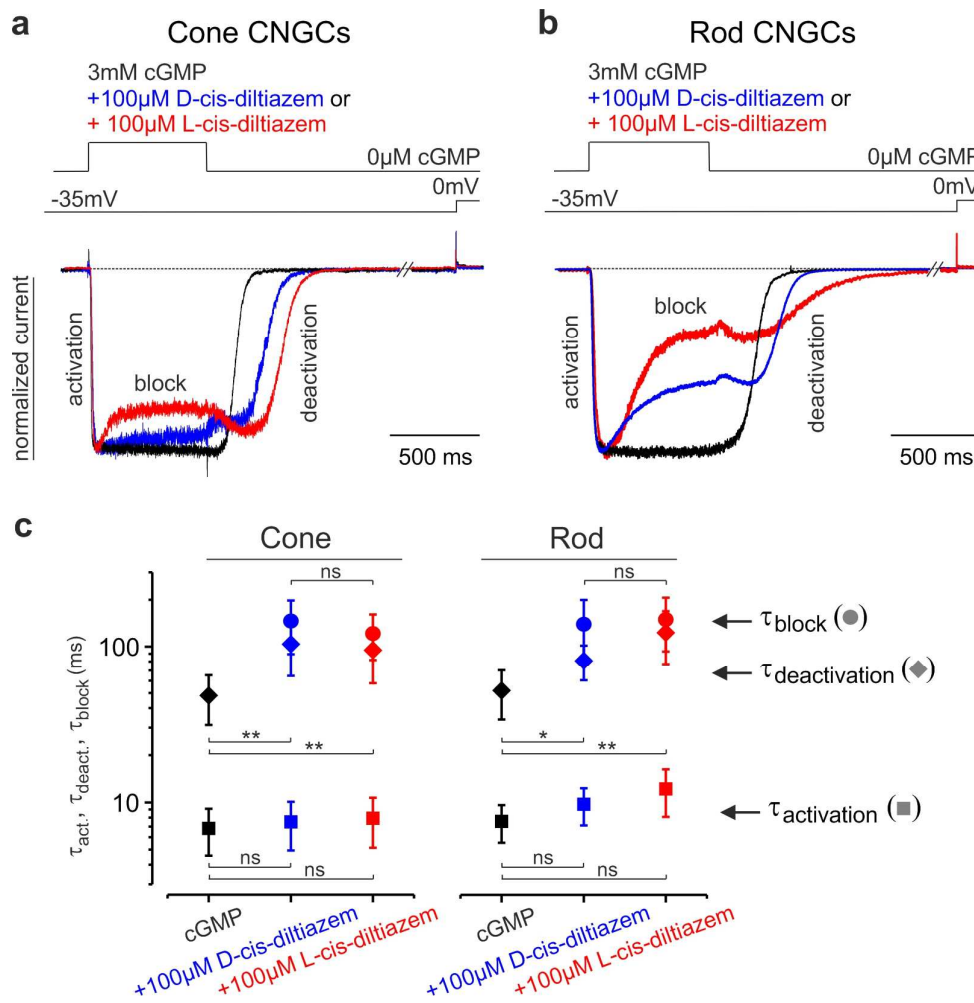

166

167 **Figure 2: D- and L-cis-diltiazem influence rod and cone CNGC gating kinetics.**  
 168 Superimposition of representative activation-, deactivation- and block- time courses  
 169 following a concentration jump from 0  $\mu$ M cGMP to either 3 mM cGMP or 3 mM cGMP  
 170 + 100  $\mu$ M D- or L-cis-diltiazem and back to 0  $\mu$ M cGMP for cone (**a**) and rod (**b**)  
 171 CNGCs (n=5-9). The current traces (blue for D-, red for L-cis-diltiazem) were  
 172 normalized to the initial current level triggered by 3 mM cGMP (black) in the absence of  
 173 diltiazem. Above the current traces are depicted the experimental protocols. The small  
 174 current increase observed during washout onset mirrors the initial phase of the  
 175 diltiazem removal. **c**) CNGC-activation, -deactivation and -block time constants ( $\tau_{act}$ ,  
 176  $\tau_{deact}$ ,  $\tau_{block}$ ). The respective traces in **a**) and **b**) were fitted with mono-exponential  
 177 functions (Eq. 3) and the resulting mean time constants and statistical analysis (ms,  
 178  $\pm$ SEM) were included in Table S4. The time course of channel deactivation was fitted  
 179 starting after the initial delay due to diltiazem removal.

180

### 181 Influence of L-cis-diltiazem on cGMP binding

182 To assess whether diltiazem influences ligand binding, we employed confocal patch-  
 183 clamp fluorometry (cPCF) (30, 31). Here, we used rod CNGC, the most diltiazem-  
 184 sensitive channel, L-cis-diltiazem, the enantiomer with the strongest blocking effect and



185 f\*cGMP (8-[DY-547]-AHT-cGMP), a fluorescent derivative of cGMP (Fig. 3) (32). As  
186 expected, the f\*cGMP-induced current (10  $\mu$ M) was reduced in the presence of L-cis-  
187 diltiazem to 10.8  $\pm$  1.1%. Upon blocker removal from an open channel, the recovery of  
188 CNGC activity showed two steps with different kinetics: a fast and a very slow phase  
189 which took several minutes (Fig. 3). Surprisingly, this behaviour differed from the faster  
190 diltiazem washout observed when the blocker and cGMP were concomitantly removed  
191 (Fig. 2a,b). This indicated an acceleration of diltiazem unbinding triggered by  
192 simultaneous channel closure.

193 During the application of L-cis-diltiazem and after its removal, we observed no major  
194 change in the intensity of the fluorescence signal which encodes for the total amount of  
195 bound f\*cGMP to CNGCs (Fig. 3). This showed that L-cis-diltiazem inhibits CNGCs  
196 independent of cGMP binding, in line with our electrophysiological data on the  
197 channel's apparent affinity (Fig. S3c,d).

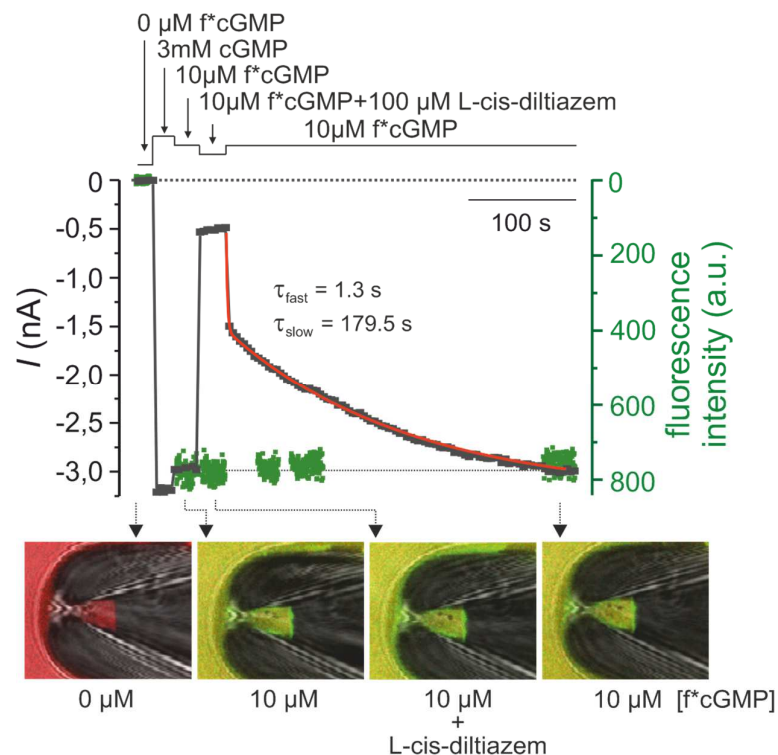

198

199 **Figure 3: L-cis-diltiazem does not influence cGMP binding to rod CNGCs.** Shown  
200 is a representative cPCF measurement for studying simultaneously f\*cGMP (8-[DY-  
201 547]-AHT-cGMP) binding and rod CNGCs activation in the presence of 100  $\mu$ M L-cis-  
202 diltiazem. f\*cGMP has a higher potency than cGMP: 10  $\mu$ M f\*cGMP triggered already  
203 87.4  $\pm$  1.4% activation of rod CNGC, which is  $\sim$ 20 times more than the activation  
204 triggered by 10  $\mu$ M cGMP. The experimental protocol is depicted above the diagram.  
205 Black symbols represent the current amplitude measured under steady-state  
206 conditions. Green symbols represent the f\*cGMP fluorescence signal which indicates  
207 the amount of ligand binding. The steady-state binding signal was normalized to the  
208 level of the 10  $\mu$ M f\*cGMP-induced current. The lower part of the diagram shows

209 confocal images of glass pipettes, containing CNGCs-expressing membrane patches,  
210 which were obtained during the measurement in the absence (first image, left), in the  
211 presence of 10  $\mu\text{M}$  f\*cGMP (second and fourth image) and in the presence of 10  $\mu\text{M}$   
212 f\*cGMP + 100  $\mu\text{M}$  L-cis-diltiazem (third image). The time course of the current recovery  
213 upon removal of L-cis-diltiazem was fitted with a double exponential function yielding  
214  $\tau_{\text{fast}} = 1.5 \pm 0.1$  s and  $\tau_{\text{slow}} = 161.9 \pm 24.5$  s (red line, n=8, Eq. 4).

215

### 216 **Effects of D- and L-cis-diltiazem on light induced photoreceptor $\text{Ca}^{2+}$ responses**

217 We next recorded light-induced photoreceptor  $\text{Ca}^{2+}$ -responses using two-photon  
218 imaging and transgenic mice expressing a fluorescent  $\text{Ca}^{2+}$ -biosensor exclusively in  
219 cones (13). As the biosensor was absent from OS, we recorded from cone terminals  
220 (Fig. 4a), using synaptic  $\text{Ca}^{2+}$  signals as a proxy for changes in membrane potential  
221 caused by light-dependent OS CNGC modulation (14). We presented series of 1-s  
222 flashes of light and measured the change (decrease) in terminal  $\text{Ca}^{2+}$ , quantifying the  
223 responses using area-under-the-curve (AUC), without (control) and with diltiazem  
224 enantiomers at different concentrations (25, 50, 100  $\mu\text{M}$ ).

225 We used a multivariate linear model to identify what factors (*i.e.*, enantiomer,  
226 concentration) were significant for predicting cellular responses (Tables S5). This  
227 analysis revealed that L-cis-diltiazem significantly decreased responses in a  
228 concentration-dependent manner, whereas D-cis-diltiazem did not affect light-induced  
229 cone  $\text{Ca}^{2+}$  responses (Fig. 4b-d; for detailed statistics, see Table S5). L-cis-diltiazem  
230 (but not D-cis-diltiazem) also tended to decrease the  $\text{Ca}^{2+}$ -baseline level (Fig. 4b,c; left  
231 vs. right).

232 These data suggested that, at physiological cGMP concentrations, treatment with L-  
233 cis-diltiazem locked synaptic  $\text{Ca}^{2+}$  concentrations at a low level, abolishing cone light  
234 responses. D-cis-diltiazem, on the other hand, had no significant effect on light-induced  
235  $\text{Ca}^{2+}$  responses in cones. Since in heterologously expressed CNGCs (Fig. 1) the rod  
236 channel isoform was more sensitive to L-cis-diltiazem than its cone counterpart, L-cis-  
237 diltiazem likely reduces rod  $\text{Ca}^{2+}$  levels even more.

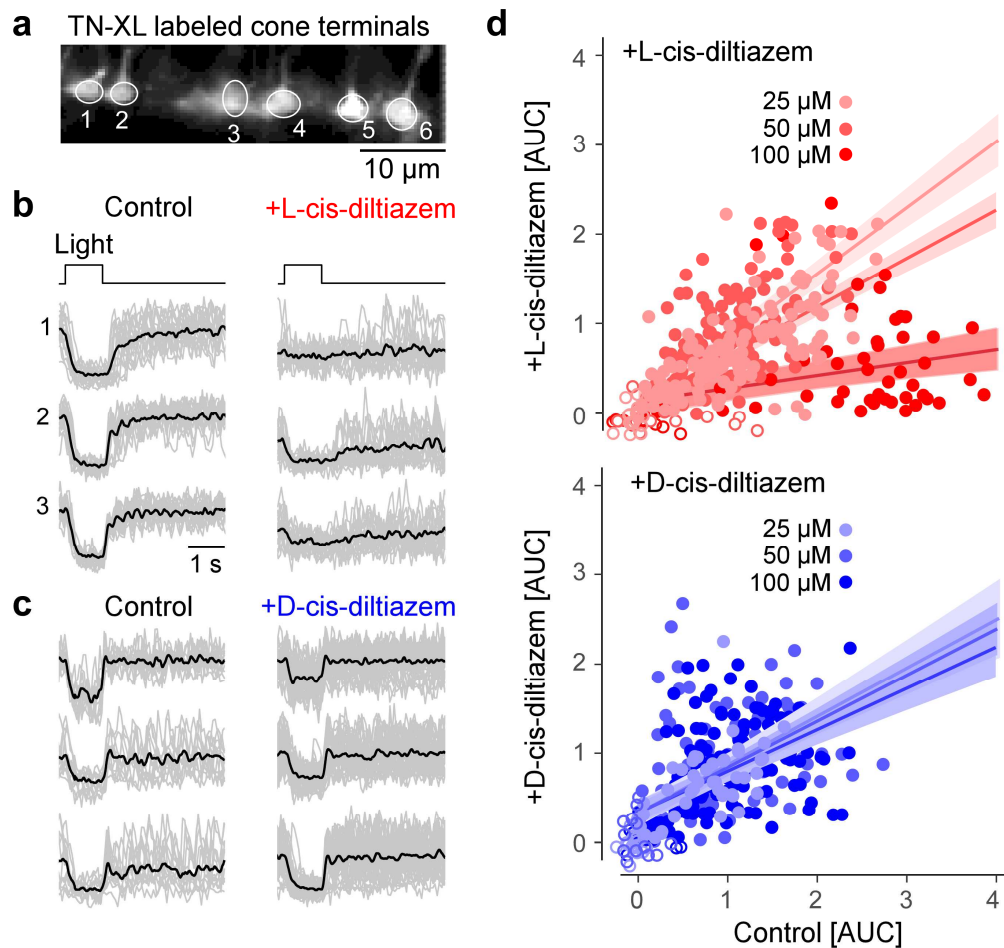

238 **Figure 4: Light-evoked Ca<sup>2+</sup>-responses are reduced by L- but not by D-cis-**  
239 **diltiazem.** (a) Recording of light-evoked Ca<sup>2+</sup>-responses from cone photoreceptor  
240 terminals, in mouse retinal slices expressing the fluorescent Ca<sup>2+</sup> sensor TN-XL in  
241 cones. (b, c) Exemplary Ca<sup>2+</sup> responses before (control) and in the presence of 100 μM  
242 L- (b) or D-cis- diltiazem (c) (grey, single trials; black, mean of n trials, with control in  
243 (b), n=13; control in (c), n=19; L-cis-diltiazem, n=19; D-cis-diltiazem, n=38). (d) Scatter  
244 plot of response size (as area-under-the-curve, AUC) for both D-cis (blue; 25/50/100  
245 μM n=137/138/61 cells) and L-cis-diltiazem (red; 25/50/100 μM n=62/140/162 cells;  
246 each data point represents a cell). Fits show mean predictions and standard errors  
247 from a multivariate linear model (Table S5).

248

### 249 Expression of CNGCs in photoreceptor outer segments

250 The effects of Ca<sup>2+</sup>-channel inhibitors on photoreceptor viability were tested using  
251 wild-type (wt) and *rd1* mice. To ascertain that CNGC was expressed in *rd1* retina in the  
252 relevant timeframe, we performed immunostaining for the CNGB1a channel subunit on  
253 retinal tissue sections collected at six different time-points between post-natal day (P)  
254 11 and 30 (Fig. S5a-c). The CNGB1a staining was also used to estimate OS length  
255 (Fig. S5d). In wt retina OS length quadrupled between P11 and P30, while dramatically  
256 decreasing in *rd1* retina in the same time window. As a proxy for photoreceptor

257 degeneration, we measured the thickness of the outer nuclear layer (ONL), which  
258 contains the photoreceptor cell bodies, within a timeframe that includes most of the  
259 unfolding of *rd1* photoreceptor degeneration (P11 to 30). Linear mixed effect models  
260 revealed statistically significant effects of genotype and post-natal day, showing  
261 significant differences for OS length between wt and *rd1* with increasing age. (Table  
262 S6). At the beginning of the *rd1* degeneration (~P10), OS length as assessed by  
263 CNGB1a expression was still comparable to that in wt animals (average P11 OS length  
264 least square means difference between wt and *rd1*:  $0.18 \pm 2.05 \mu\text{m}$ ,  $F(1, 25.25) =$   
265  $0.0078$ ;  $p = 0.9304$ ). Hence, in *rd1* retina the window-of-opportunity for CNGC-targeting  
266 treatments was expected to last until P11 at least.

### 267 **Proteolytic activity in photoreceptors after treatment with D- and L-cis-diltiazem**

268 The influx of  $\text{Ca}^{2+}$  through CNGCs may be connected to activation of  $\text{Ca}^{2+}$ -  
269 dependent calpain-type proteases (33). Therefore, we investigated the effects of D-  
270 and L-cis-diltiazem treatment, using an *in situ* calpain activity assay and  
271 immunodetection of activated calpain-2 (34), and organotypic retinal explant cultures  
272 derived from wt and *rd1* animals, treated from P7 to P11.

273 In wt retina, least square means plot showed calpain activity and calpain-2 activation  
274 to be rather low, when compared to *rd1* where both markers labelled large numbers of  
275 photoreceptors in the ONL (Fig. 5a-d). In both genotypes, treatment with D-cis-  
276 diltiazem had no detectable effect on the numbers of photoreceptors positive for  
277 calpain activity or calpain-2 activation (Fig. 5e-h, Tables S7, S8). Surprisingly, when  
278 retinal explants were treated with L-cis-diltiazem (Fig. 5i-l), calpain-2 activation in the  
279 ONL was significantly increased ( $F(1, 11.87) = 14.7372$ ;  $p = 0.0024$ ; Fig. 5i,j,n; Table  
280 S8). Thus, neither D- nor L-cis-diltiazem reduced overall calpain activity in wt or *rd1*  
281 photoreceptors, while a significant increase in calpain-2 activation was observed with L-  
282 cis-diltiazem (Fig. 5m,n; Tables S7, S8).

283 Activity of caspase-type proteases is commonly associated with apoptosis. To  
284 investigate possible links with apoptosis, *rd1* treated and untreated retinas were tested  
285 for activation of caspase-3, using an antibody directed against the active protease (35).  
286 Under all conditions tested, caspase-3 activity was essentially undetectable in retinal  
287 sections (Fig. S6, Table S7), thus ruling out an important contribution of caspase  
288 activity and, by extension, of apoptosis to retinal degeneration, with or without diltiazem  
289 treatment.

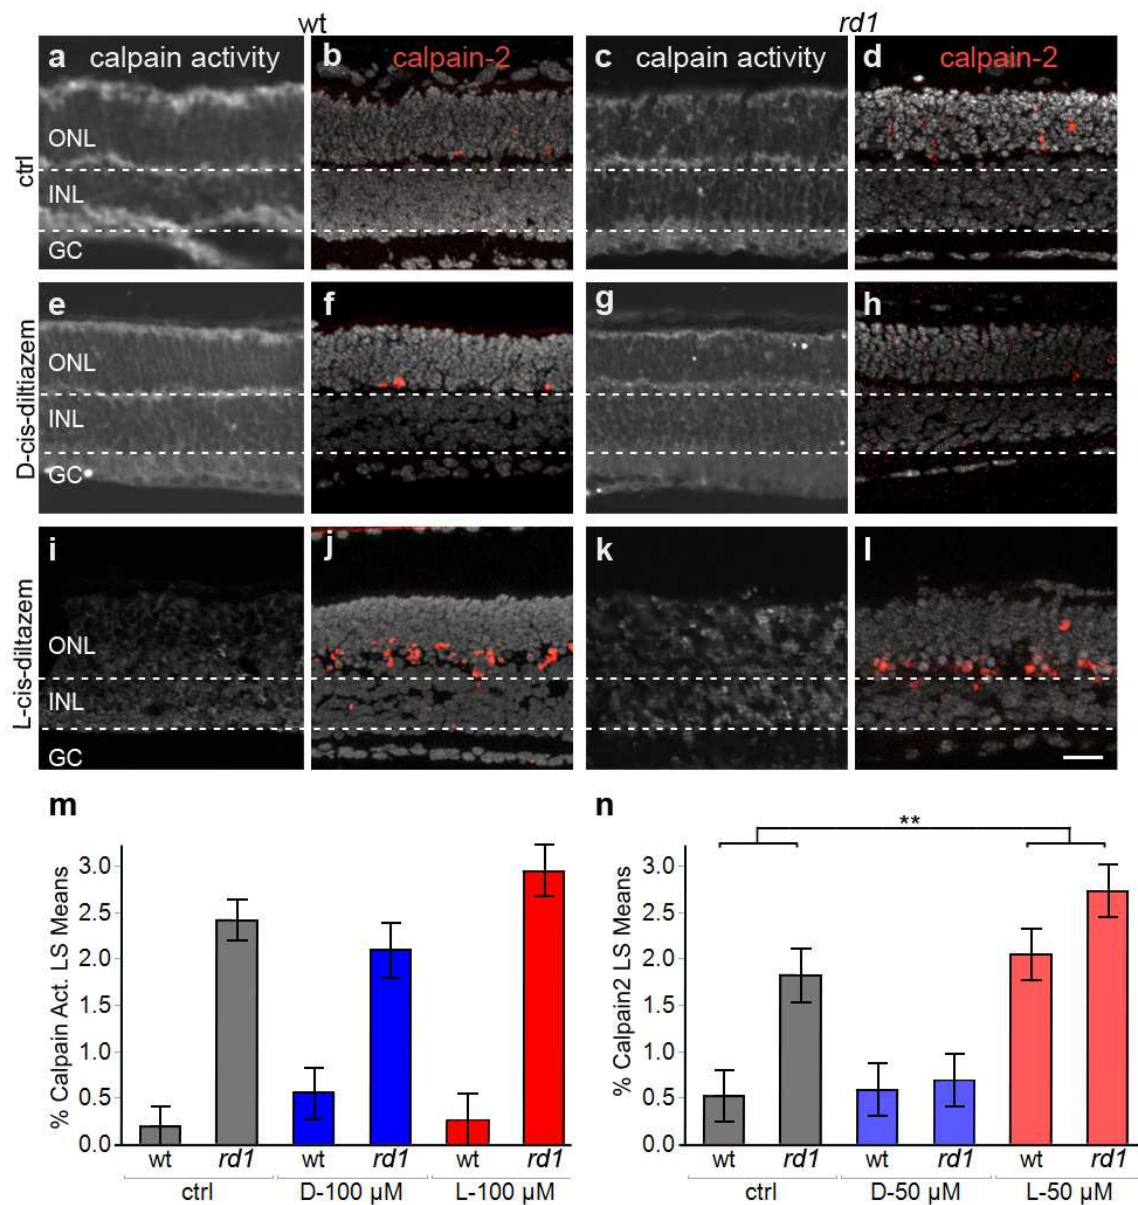

290

291 **Figure 5: Effects of diltiazem treatment on calpain activity.** Calpain-activity assay  
 292 and immunostaining for activated calpain-2 in wt and *rd1* retina. Untreated retina (ctrl;  
 293 **a-d**) was compared to treatment with D-cis diltiazem (**e-h**) or L-cis diltiazem (**i-l**). The  
 294 bar graphs show the least-square (LS) means percentages of cells positive for calpain  
 295 activity (**m**) and activated calpain-2 (**n**) in wt and *rd1* retina, compared to the untreated  
 296 control (ctrl). Asterisks indicate a statistically significant difference from a contrast test  
 297 performed between control and 50 μM L-cis-diltiazem treatment (L-50 μM). For  
 298 statistical analysis, see Tables S7 and S8; error bars represent SEM; \*\* =  $p < 0.01$ .  
 299 Scale bar = 30 μm.

### 300 **Impact of D- and L-cis-diltiazem on *rd1* photoreceptor degeneration**

301 We used the TUNEL assay to quantify photoreceptor cell death (36) after D- or L-cis-  
 302 diltiazem treatment on organotypic retinal explant cultures derived from wt, *rd1*, and  
 303 *rd10* animals (33). The ONL of wt retinal explants displayed a relatively low number of

304 TUNEL positive cells, when compared to *rd1* (Fig. 6a,b). D-cis-diltiazem treatment did  
305 not elevate the numbers of dying cells in wt or *rd1* ONL (Fig. 6c,d). In contrast, L-cis-  
306 diltiazem (Fig. 6e,f) increased cell death in both wt ( $F(1, 21.63) = 86.7207, p < 0.0001$ )  
307 and *rd1* retina ( $F(1, 26.68) = 191.1994, p < 0.0001$ ; Fig. 6g,h, Tables S7, S8).

308 Typically, TUNEL positive cells in untreated retinal explants were uniformly  
309 distributed across the whole ONL (Fig. 6a,b; percent *rd1* dying cells in inner half of ONL  
310 =  $60 \pm 3\%$ ). With D-cis-diltiazem treatment  $57 \pm 4\%$  of dying cells were localized to the  
311 same space (Fig. 6c,d), while, curiously, with L-cis-diltiazem treatment  $85 \pm 3\%$  ( $F(1,$   
312  $10.42) = 54.2025, p < 0.0001$ ; Tables S7, S8) of the TUNEL positive cells were seen in  
313 the lower ONL half (Fig. 6e,f,i).

314 A study on *rd10* retina yielded results similar to *rd1*: 100  $\mu\text{M}$  D-cis-diltiazem had no  
315 significant effect on cell death, while 100  $\mu\text{M}$  L-cis-diltiazem treatment caused a strong  
316 increase in photoreceptor cell death ( $F(1, 9.25) = 42.9966, p < 0.0001$ ; Fig. 6j).

317 Taken together, our data indicate that L-cis-diltiazem treatment in wt retina was toxic  
318 to photoreceptors at concentrations above 25  $\mu\text{M}$ . In *rd1* retina showed such toxicity  
319 only at concentrations above 50  $\mu\text{M}$ , which might be related to higher photoreceptor  
320 cGMP levels and concomitant higher CNGC activity. In comparison, D-cis-diltiazem, up  
321 to 100  $\mu\text{M}$ , did not detectably influence cell viability in either wt-, *rd1*-, or *rd10*- retinas.  
322 Importantly, both diltiazem enantiomers failed to show protective effects in *rd1* or *rd10*  
323 mutant retina.

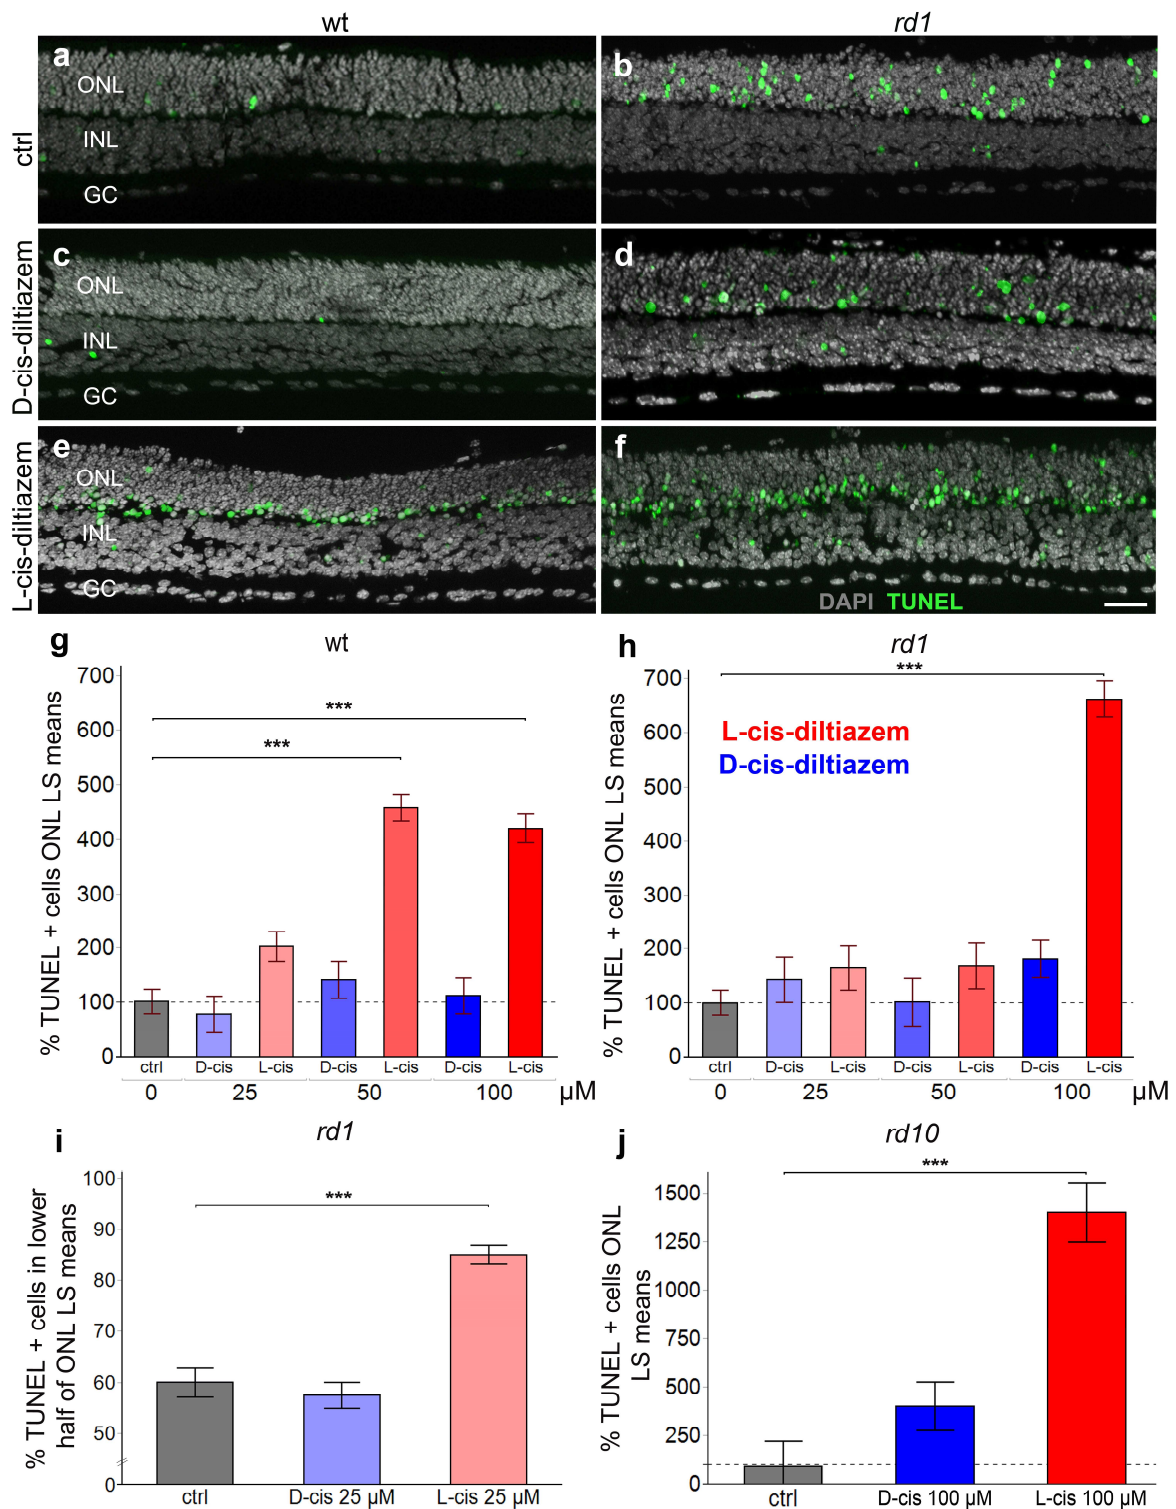

324

325 **Figure 6: Effects of D- and L-cis-diltiazem on retinal cell viability.** The TUNEL  
 326 assay was used to label dying cells (green) in wt and *rd1* retinal explant cultures. DAPI  
 327 (grey) was used as a nuclear counterstain. Control retina (untreated; **a**, **b**) was  
 328 compared to retina treated with either 50 μM of D- (**c**, **d**) or L-cis-diltiazem (**e**, **f**). Note  
 329 the large numbers of dying cells in the *rd1* outer nuclear layer (ONL). The bar charts  
 330 show the least-square (LS) means percentage of TUNEL positive cells as a function of  
 331 diltiazem concentration, for wt (**g**) and *rd1* (**h**) retina, as a function of localization with

332 respect to the outer plexiform layer (OPL) (i), and for *rd10* retina (j), respectively. In wt,  
333 *rd1*, and *rd10* retina treatment with L-cis-diltiazem strongly increased the numbers of  
334 TUNEL positive cells in the ONL. Statistical significance was analysed by post-hoc  
335 contrast test (*cf.* Table S8), errors bars represent SEM, \*\*\* =  $p < 0.001$ . INL = inner  
336 nuclear layer, GC = ganglion cell layer. Scale bar = 50 $\mu$ m.

337

### 338 III. DISCUSSION

339 We show that diltiazem enantiomers were highly effective at blocking photoreceptor  
340  $Ca^{2+}$  influx through CNGCs at pathologically high cGMP concentrations, likely by  
341 blocking the channel's pore. Unexpectedly, this block did not result in photoreceptor  
342 protection. These results raise the question whether  $Ca^{2+}$ -permeable channels are  
343 suitable targets for therapeutic interventions, and furthermore suggest that high  
344 intracellular  $Ca^{2+}$  is not *per se* a driver of photoreceptor death.

#### 345 Effect of D- and L-cis-diltiazem on photoreceptor CNGCs

346 At physiological cGMP, neither D- nor L-cis-diltiazem showed an appreciable  
347 inhibitory effect on heterologously expressed CNGCs. At high, RP-like cGMP  
348 concentrations, both diltiazem enantiomers reduced rod and cone CNGC activity,  
349 although L-cis-diltiazem had a much stronger inhibitory effect on rod CNGC than D-cis-  
350 diltiazem. The inhibition was strongly voltage dependent, suggesting that a disease-  
351 induced photoreceptor depolarization would amplify diltiazem effects on CNGCs.  
352 Although electrophysiological recordings from single photoreceptors of retinal disease  
353 models are rare (37), *rd1* rod photoreceptors can be expected to be permanently  
354 depolarized due to elevated CNGC activity triggered by high cGMP.

355 Earlier studies on photoreceptor CNGC proposed several binding sites for diltiazem,  
356 either at the pore entrance, on the cytoplasmic side of the channel (38), or within the  
357 channel pore (39). Recently, L-cis-diltiazem was shown to bind within the conductive  
358 pathway of voltage-gated  $Ca^{2+}$ -channels ( $Ca_vAb$  and  $Ca_v1.1$ ) (40, 41). Our data on  
359 CNGC, *e.g.*, (1) the time delay observed between channel activation and diltiazem  
360 block and between diltiazem removal and channel closure, (2) the acceleration of  
361 diltiazem removal by a concomitant channel deactivation, and (3) the undisturbed  
362 cGMP binding in the presence of diltiazem, suggests that L-cis-diltiazem acts in a  
363 similar way, by blocking the CNGC pore. These findings, indicating an open-channel  
364 block, concur with the recent eukaryotic (42) and human CNG (43) cryo-EM channel  
365 structures.

366 Moreover, we observed a negative influence of diltiazem on the cooperativity



367 between CNGC subunits. Since L-cis-diltiazem inhibits only heterotetrameric channels  
368 (25), this suggests a direct interaction between diltiazem and the modulatory subunits,  
369 rod CNGB1a and cone CNGB3, respectively. Future studies using molecular-docking  
370 approaches may help identify the diltiazem binding site within the channel's pore and  
371 its biophysical characteristics.

### 372 **An overview on Ca<sup>2+</sup> flux in photoreceptor degeneration**

373 Photoreceptor degeneration in hereditary retinal diseases has long been proposed to  
374 be caused by excessive Ca<sup>2+</sup> influx (10, 19), *i.e.* the “high Ca<sup>2+</sup> hypothesis”.  
375 Paradoxically, too low Ca<sup>2+</sup> was also suggested to cause photoreceptor death,  
376 something that may be called the “low Ca<sup>2+</sup> hypothesis” (44). Subsequently, we discuss  
377 Ca<sup>2+</sup> flux in different photoreceptor compartments (Fig. 7a) and will attempt to resolve  
378 some of the contradictions between high and low Ca<sup>2+</sup> hypotheses.

379 In wt photoreceptors, under dark conditions, Ca<sup>2+</sup> and Na<sup>+</sup> enter the OS (Fig. 7b).  
380 While Ca<sup>2+</sup> is extruded from the OS via NCKX, Na<sup>+</sup> is actively exported by ATP-  
381 dependent NKX in the IS (45). In cell body and synapse, Ca<sup>2+</sup> is extruded by the  
382 plasma membrane Ca<sup>2+</sup>-ATPase (PMCA) (46). During illumination, cGMP levels drop,  
383 CNGCs and then VGCCs close, and Ca<sup>2+</sup> levels in OS and synapse decrease (Fig. 7c).  
384 In *rd1* retina, the constitutively open CNGCs allow for permanent Ca<sup>2+</sup> and Na<sup>+</sup> influx,  
385 increasing NKX activity and perhaps resulting in ATP depletion (Fig. 7d) (47). L-cis  
386 diltiazem will block CNGC, reducing Ca<sup>2+</sup> influx into the OS (Fig. 7e). D-cis-diltiazem in  
387 turn blocks mostly VGCC and prevents Ca<sup>2+</sup> influx into cell body and synapse (Fig. 7f).

388 Surprisingly, calpain-2 activation was increased by the L-cis-diltiazem treatment.  
389 This may have been caused by a depletion of Ca<sup>2+</sup> in intracellular stores and a  
390 subsequent activation of store-operated Ca<sup>2+</sup> entry (SOCE) via Ca<sup>2+</sup> release-activated  
391 Ca<sup>2+</sup> channels (CRACs) (48). Indeed, VGCC block with diltiazem was recently shown to  
392 activate SOCE in vascular smooth muscle cells (49) and this process may selectively  
393 activate calpain-2 (50). Thus, photoreceptor degeneration initially caused by very low  
394 Ca<sup>2+</sup> levels, may trigger a consequent increase of Ca<sup>2+</sup> and calpain-2 activity via  
395 SOCE, possibly explaining the apparent contradiction between high and low Ca<sup>2+</sup>  
396 hypotheses. Moreover, low photoreceptor Ca<sup>2+</sup> levels will disinhibit guanylyl cyclase,  
397 increasing cGMP production (51), which may then kill photoreceptors independent of  
398 Ca<sup>2+</sup> via over-activation of cGMP-dependent protein kinase G (PKG) (52, 53).

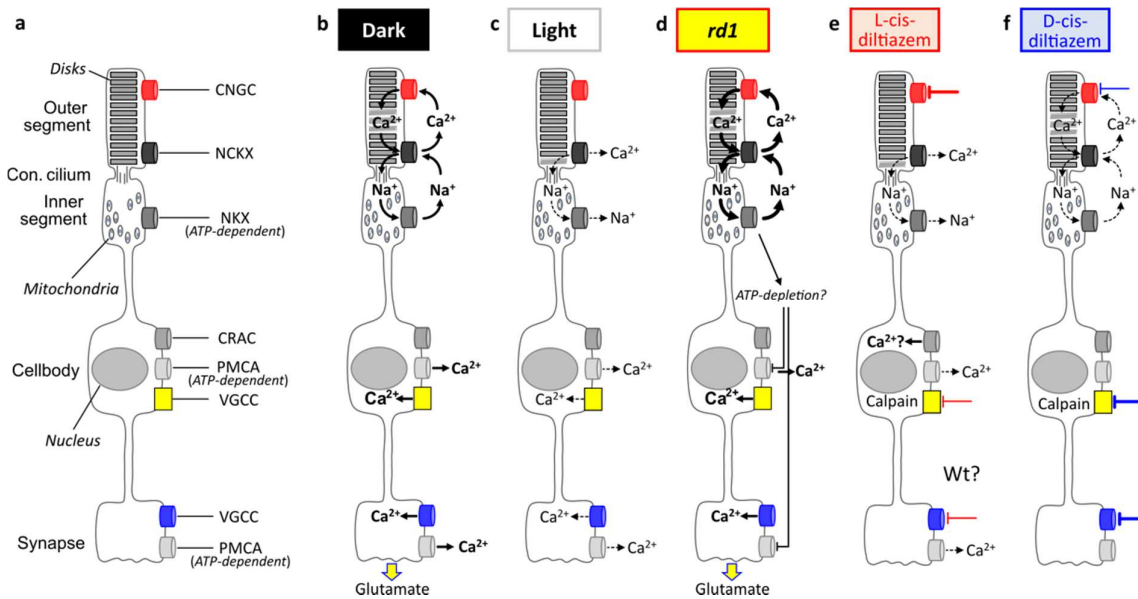

399

400 **Figure 7: Schematic representation of photoreceptor  $\text{Ca}^{2+}$  flux under different**  
 401 **experimental conditions. (a)** The phototransduction cascade is compartmentalized to  
 402 the photoreceptor outer segments, which harbour cyclic nucleotide-gated channel  
 403 (CNGC) and  $\text{Na}^+/\text{Ca}^{2+}/\text{K}^+$  exchanger (NCKX). The connecting cilium links outer to inner  
 404 segment, which holds almost all mitochondria and the ATP-driven  $\text{Na}^+/\text{K}^+$  exchanger  
 405 (NKX). The cell body harbours the nucleus as well as  $\text{Ca}^{2+}$ -release activated channel  
 406 (CRAC), plasma membrane  $\text{Ca}^{2+}$ -ATPase (PMCA), and voltage-gated  $\text{Ca}^{2+}$  channels  
 407 VGCC. PMCA and VGCC are also found in the synapse. **(b)** In the dark, the flux of  $\text{Na}^+$   
 408 and  $\text{Ca}^{2+}$  ions across the photoreceptor membrane (*i.e.*, the dark current) keeps the cell  
 409 in a continuously depolarized state. The  $\text{Ca}^{2+}$  ions enter the outer segment via  
 410 CNGC and exits via NCKX. The  $\text{Na}^+$  gradient needed to drive NCKX is maintained by  
 411 the ATP-dependent NKX in the inner segment. At the same time, in the photoreceptor  
 412 cell body and synapse, VGCC allows for  $\text{Ca}^{2+}$  influx, mediating synaptic glutamate  
 413 release. In the cell body and synapse,  $\text{Ca}^{2+}$  is extruded by the ATP-dependent PMCA.  
 414 **(c)** In light, CNGC closes, while  $\text{Ca}^{2+}$  continues to exit the cell via NCKX, leading to  
 415 photoreceptor hyperpolarization. This in turn closes VGCC, ending synaptic glutamate  
 416 release. **(d)** In *rd1* photoreceptors, high cGMP continuously opens CNGC, representing  
 417 a situation of “constant darkness”. Excessive NKX activity in *rd1* may cause a depletion  
 418 of ATP, preventing  $\text{Ca}^{2+}$  extrusion via PMCA. **(e)** L-cis-diltiazem (red lines) blocks  
 419 predominantly CNGC, with an additional block on VGCC at high concentrations. This  
 420 resembles a situation of “constant light” and may cause a depletion of intracellular  $\text{Ca}^{2+}$   
 421 and secondary  $\text{Ca}^{2+}$  influx via activation of CRAC. **(f)** D-cis-diltiazem (blue lines)  
 422 inhibits predominantly VGCC, with a partial block on CNGC at high concentrations.

### 423 Calpain activity, $\text{Ca}^{2+}$ , and cell death

424 Previously, we had proposed calpain activation in dying photoreceptors to be  
 425 mediated by high cGMP-activated CNGCs (33). However, the low mobility of  $\text{Ca}^{2+}$  ions  
 426 from OS to IS (13, 54, 55) argues against CNGC-dependent  $\text{Ca}^{2+}$ -influx directly  
 427 activating calpain in the cell body and beyond. Instead, our data suggests that calpain  
 428 activation may be mediated indirectly by  $\text{Ca}^{2+}$  influx via VGCC located in cell body and  
 429 synapse, in line with data obtained from genetic inactivation of VGCC (15).

430 L-cis-diltiazem was highly effective at blocking Ca<sup>2+</sup> influx in heterologously-  
431 expressed rod CNGC and displayed a good rod vs. cone CNGC selectivity. When *rd1*  
432 retina was treated with L-cis-diltiazem, rod CNGCs were expressed in photoreceptors  
433 during the treatment period. Yet, we were unable to demonstrate a protective effect of  
434 L-cis-diltiazem on *rd1* retina. Even worse, at higher concentrations, L-cis-diltiazem  
435 showed obvious signs of toxicity, in wt, *rd1*, and *rd10* retina. This is contradicting the  
436 results seen with genetic inactivation of CNGC in *rd1* \* *Cngb1*<sup>-/-</sup> double-mutant mice (9).  
437 Yet, such animals likely still retain CNGA1 homotetrameric channels, which may allow  
438 for limited Ca<sup>2+</sup> influx into the photoreceptor (56). In addition, loss-of-function mutations  
439 in CNGC genes are known to cause photoreceptor degeneration in both RP (57) and  
440 ACHM (58). Hence, on a genetic level, low activity of CNGC and decreased Ca<sup>2+</sup> influx  
441 into photoreceptor OSs is clearly connected to photoreceptor degeneration.

442 Incidentally, inhibition of VGCC with D-cis-diltiazem also failed to show significant  
443 photoreceptor protection. This is in line with a number of earlier studies (reviewed in  
444 (5)) and corroborates on a pharmacological level our previous study employing the *rd1*  
445 \* *Cacna1f*<sup>-/-</sup> double-mutants, *i.e.* *rd1* mice in which the synaptic VGCC was  
446 dysfunctional (15). In contrast to L-cis-diltiazem, D-cis-diltiazem did not appear to be  
447 overly retinotoxic even at high concentrations. This corresponds to the genetic situation  
448 where loss-of-function mutations in VGCC impair synaptic transmission from  
449 photoreceptors to second order neurons. While such mutations can cause night-  
450 blindness, they do not usually cause photoreceptor degeneration (59).

451 Excessive Ca<sup>2+</sup> influx via CNGC and/or VGCC has for a long time been suggested  
452 as a major driver for photoreceptor cell death (9, 19). However, follow-up studies have  
453 produced contradictory results (5). Our present study sheds light onto this enigma and  
454 demonstrates that both D- and L-cis enantiomers of the anti-hypertensive drug  
455 diltiazem can reduce photoreceptor Ca<sup>2+</sup> influx. Remarkably, treatment with either  
456 compound and inhibition of either VGCC or CNGC did not result in photoreceptor  
457 protection. Moreover, the use of L-cis-diltiazem and the concomitant reduction of Ca<sup>2+</sup>  
458 influx strongly reduced photoreceptor viability, indicating that Ca<sup>2+</sup>-influx was in fact  
459 protective, rather than destructive. Altogether, this supports the “low Ca<sup>2+</sup>” hypothesis  
460 (44) and cGMP-dependent processes (53) as the more likely causes of photoreceptor  
461 degeneration.

462

463

## 464 **IV. Materials and Methods**

### 465 **Animals**

466 Animals used in this study were handled according to the German law on animal  
467 protection. All efforts were made to keep the number of animals used and their  
468 suffering to a minimum. Mice were bred in the Tübingen Institute for Ophthalmic  
469 Research specified-pathogen-free (SPF) housing facility, under 12h/12h light/dark  
470 cycle, had *ad libitum* access to food and water, and were used irrespective of gender.  
471 The experimental procedures involving animals were reviewed and approved by the  
472 institutional animal welfare committee of the University of Tübingen.

473 For retinal explant cultures C3H/HeA *Pde6b*<sup>rd1/rd1</sup> animals (*rd1*) and their respective  
474 congenic wild-type C3H/HeA *Pde6b*<sup>+/+</sup> counterparts (*wt*) were used (60). Further  
475 studies were performed on explants derived from C57BL/6J *Pde6b*<sup>rd10/rd10</sup> animals  
476 (*rd10*) (33). For studying light-induced Ca<sup>2+</sup> responses in cone photoreceptors, we used  
477 transgenic mice expressing the Ca<sup>2+</sup> biosensor TN-XL (61) under the human red opsin  
478 promoter HR2.1 on a C57BL/6J background (13).

479 The procedures regarding the *Xenopus laevis* frogs and the handling of the oocytes  
480 had approval from the authorized animal ethics committee of the Friedrich Schiller  
481 University Jena (Germany). The respective protocols were performed in accordance  
482 with the approved guidelines.

### 483 **Molecular biology and functional expression of heterotetrameric CNGCs in** 484 ***Xenopus laevis* oocytes**

485 The coding sequences for the retinal CNGC subunits, bovine CNGA1  
486 (NM\_174278.2) (62) and CNGB1a (NM\_181019.2) (63) from rod photoreceptors and  
487 human CNGA3 (NM\_001298.2) (64) and CNGB3 (NM\_019098.4) (65) from cone  
488 photoreceptors, were subcloned into the pGEMHE vector (66) for heterologous  
489 expression in *Xenopus laevis* oocytes. The surgical removal of oocytes was performed  
490 from adult frog females under anaesthesia (0.3% tricaine; MS-222, Pharmaq Ltd.,  
491 Fordingbridge, UK). The oocytes were treated with collagenase A (3 mg/ml; Roche  
492 Diagnostics, Mannheim, Germany) for 105 min in Barth's solution containing (in mM)  
493 82.5 NaCl, 2 KCl, 1 MgCl<sub>2</sub>, and 5 HEPES, pH 7.5. After this procedure, oocytes of  
494 stages IV and V were manually dissected and injected with the genetic material  
495 encoding for the CNGC from rod and cone photoreceptors. For efficient generation of  
496 heterotetrameric channels, the ratio of CNGA3 mRNA to CNGB3 mRNA was 1:2.5 (25)

497 and of CNGA1 mRNA to CNGB1a mRNA was 1:4 (67). After injection, the oocytes  
498 were kept at 18°C for 2 to 7 days in Barth's solution containing (in mM) 84 NaCl, 1 KCl,  
499 2.4 NaHCO<sub>3</sub>, 0.82 MgSO<sub>4</sub>, 0.41 CaCl<sub>2</sub>, 0.33 Ca(NO<sub>3</sub>)<sub>2</sub>, 7.5 Tris, cefuroxime (4.0 µg×ml<sup>-1</sup>)  
500 <sup>1</sup>), and penicillin/streptomycin (100 µg×ml<sup>-1</sup>), pH 7.4.

## 501 **Electrophysiology**

502 Macroscopic ionic currents were measured with the patch-clamp technique and the  
503 inside-out configuration, using an Axopatch 200B patch-clamp amplifier (Axon  
504 Instruments, Foster City, CA). Recordings were made at room temperature. Current  
505 data were acquired using PATCHMASTER software (HEKA Elektronik, Lambrecht,  
506 Germany) with a sampling frequency of 5 kHz, and low-pass filtered at 2 kHz. From a  
507 holding potential of 0 mV, currents were elicited by voltage steps to -65 mV, then to -35  
508 mV, and back to 0 mV. When mentioned, also voltage steps to -100 mV and +100 mV  
509 were recorded. The patch pipettes were pulled from borosilicate glass tubing (outer  
510 diameter 2.0 mm, inner diameter 1.0 mm; Hilgenberg GmbH, Germany). The initial  
511 resistance was 0.6-1.3 MΩ. Intracellular and extracellular solutions contained 140 mM  
512 NaCl, 5 mM KCl, 1 mM EGTA, and 10 mM HEPES (pH 7.4). The Ca<sup>2+</sup>-containing  
513 solutions were: 120 mM NaCl, 3 mM KCl, 2 mM NTA, 0.5 mM niflumic acid, 10 mM  
514 HEPES and 1 mM CaCl<sub>2</sub> (pH 7.4) for the extracellular side and 145 mM KCl, 8 mM  
515 NaCl, 2 mM NTA, 10 mM HEPES and 0.05 mM CaCl<sub>2</sub> (pH 7.4) for the intracellular side  
516 (28).

517 The cyclic nucleotides, cAMP (Merck KGaA, Darmstadt, Germany) or cGMP (Biolog  
518 LSI GmbH & Co KG, Bremen, Germany), were added to intracellular solutions as  
519 indicated. Either D- or L-cis-diltiazem (Abcam - ab120260 and Abcam - ab120532,  
520 respectively, Germany) were added to the cGMP-containing solutions to a final  
521 concentration of 25 µM and 100 µM as required. The diltiazem-containing solutions  
522 were prepared from stock solutions (10 mM) immediately before experiments. The  
523 cGMP-solutions, or solution mixtures containing cGMP and either D- or L-cis-diltiazem  
524 were administered via a multi-barrel application system to the cytosolic face of the  
525 patch.

526 For studying CNGC activation and deactivation kinetics we performed fast solution  
527 jumps (from zero to either 3 mM cGMP or 3 mM cGMP + 100 µM D- or L-cis-diltiazem  
528 and back to zero) by means of a double-barrelled θ-glass pipette mounted on a piezo-  
529 driven device (68). The recording rate was 20 Hz. The solution exchange at the pipette  
530 tip was completed within 1 ms (69).

### 531 **Confocal patch-clamp fluorometry (cPCF)**

532 The influence of D- and L-cis-diltiazem on cGMP binding was studied by means of  
533 cPCF. The method has been described in detail previously (31, 70, 71). The  
534 experiments were performed in inside-out macropatches of *Xenopus laevis* oocytes  
535 expressing heterotetrameric rod CNGC, at -35 mV. As fluorescent ligand we used 8-  
536 [DY-547]-AHT-cGMP (f\*cGMP). f\*cGMP was prepared in analogy to the related cyclic  
537 nucleotides 8-[DY-547]-AET-cGMP and 8-[DY-547]-AHT-cAMP (31, 32). To be able to  
538 differentiate between the fluorescence of the bound f\*cGMP from the fluorescence  
539 generated by the free f\*cGMP in the bath solution, we used an additional red dye,  
540 DY647 (Dyomics, Jena, Germany), at a concentration of 1  $\mu$ M.

541 Recordings were performed with an LSM 710 confocal microscope (Carl Zeiss Jena  
542 GmbH, Germany) and were triggered by the ISO3 hard- and software (MFK,  
543 Niedernhausen, Germany; sampling rate 5 kHz, 4-pole Bessel filter set to 2 kHz). Due  
544 to the relative long duration of the experiment, to avoid cell-membrane exposure to  
545 damaging amounts of light, binding was measured under steady-state conditions,  
546 during pre-selected time windows only: in the presence of 10  $\mu$ M f\*cGMP, during the  
547 jump to 10  $\mu$ M f\*cGMP + 100  $\mu$ M L-cis-diltiazem and during L-cis-diltiazem removal  
548 from the open channels.

### 549 **Colocalization experiments**

550 To verify the correct incorporation of heterotetrameric CNGCs into the oocyte  
551 plasma membrane we labelled the cone CNGB3- and rod CNGB1a-subunit by fusing  
552 enhanced GFP to their intracellularly located C terminus. At first, we introduced an *AvrII*  
553 site in pGEMHE-CNGB1a by site-directed mutagenesis at CNGB1a K1205 which was  
554 thereby changed to R1205. Afterwards, the PCR amplified *EGFP* gene was ligated into  
555 the newly generated *AvrII* site of the pGEHME-CNGB1a construct. To fuse EGFP into  
556 CNGB3 C-terminus, we introduced an *XhoI* site in pGEMHE-CNGB3 by site-directed  
557 mutagenesis at CNGB3 P668 and K669 which were thereby changed to L668 or E669,  
558 respectively. Afterwards, the PCR amplified *EGFP* gene was ligated into the newly  
559 generated *XhoI* site of the pGEHME-CNGB3 construct. The correct insertion of PCR  
560 products was confirmed by DNA sequencing.

561 The oocyte membrane was stained from the extracellular side with fluorescently  
562 labelled lectin (Alexa Fluor™ 633 - wheat germ agglutinin (Alexa-WGA), Invitrogen Life  
563 Technologies Corporation, Eugene, Oregon, red fluorescence signal) (71). For this the  
564 oocytes were incubated in 5  $\mu$ g/ml Alexa-WGA for 7 minutes. Alexa-WGA was excited

565 with the 633-nm line of a helium neon laser. GFP was excited with the 488-nm line of  
566 an argon laser. GFP- and WGA-fluorescence profiles measured along an imaginary  
567 line perpendicular to the plasma membrane, were quantified using the LSM 710 image  
568 analysis software.

### 569 **Analysis of the oocyte data**

570 For concentration-activations relationships, each patch was first exposed to a  
571 solution containing no cGMP and then to a solution containing the saturating  
572 concentration of 3 mM cGMP. After subtracting the baseline current from the current  
573 amplitude in the presence of cGMP, the current response for each ligand concentration  
574 was normalized to the saturating current. The experimental data points were fitted  
575 using the Hill equation:

$$576 \quad \frac{I}{I_{max}} = \frac{1}{1 + \left(\frac{EC_{50}}{x}\right)^H} \quad \text{(Equation 1)}$$

577 where  $I$  is the current amplitude,  $I_{max}$  is the maximum current induced by a saturating  
578 cGMP concentration,  $x$  is the ligand concentration,  $EC_{50}$  is the ligand concentration of  
579 half maximum effect, and  $H$  is the Hill coefficient. The analysis was performed with  
580 OriginPro 2016G software (OriginLab Corporation, Northampton, USA). Experimental  
581 data are given as mean  $\pm$ SEM.

582 The effect of either D- or L-cis- diltiazem was quantified by measuring the cGMP-  
583 induced current, under steady-state conditions at the end of either -100 mV, -35 mV, or  
584 +100 mV pulse, in the presence of diltiazem as required. The amount of diltiazem block  
585 (%) is related to the current at the respective cGMP concentration and the amount of  
586 current decrease in the presence of diltiazem and was calculated as follow (here  
587 exemplified for the 100  $\mu$ M cGMP-induced current):

$$588 \quad diltiazem \text{ block } (\%) = 100 - \frac{\frac{I_{(100\mu M \text{ cGMP} + x \mu M \text{ Diltiazem})}}{I_{(3mM \text{ cGMP} + x \mu M \text{ Diltiazem})}} \cdot 100}{\frac{I_{(100\mu M \text{ cGMP})}}{I_{(3mM \text{ cGMP})}}} \quad \text{(Equation 2)}$$

590 The time courses for channel activation, deactivation (starting after the respective initial  
591 delay due to diltiazem removal) and diltiazem block were fitted with a single  
592 exponential:

$$593 \quad I(t) = A * \exp\left[\frac{-t}{\tau}\right] \quad \text{(Equation 3)}$$

594 where  $A$  is the amplitude,  $t$  the time, and  $\tau$  the time constant for either activation,  
595 deactivation, or block.

596 The time course for diltiazem washout was fitted with a double-exponential function:

$$597 \quad I(t) = A_1 * \exp\left[\frac{-t}{\tau_{fast}}\right] + A_2 * \exp\left[\frac{-t}{\tau_{slow}}\right] + y_0 \quad (\text{Equation 4})$$

598 where  $A_1, A_2$  are the amplitudes of the fast and slow components,  $t$  the time, and  $\tau_{fast}$   
599 and  $\tau_{slow}$  the time constants for the fast and slow phase of the diltiazem washout.

600 For statistical analysis of D- and L-cis-diltiazem effect on retinal CNGCs, we used  
601 the two-tailed unpaired Student  $t$ -test. Figures were prepared using CorelDraw X7  
602 (Corel, Ottawa, Canada).

### 603 **Retinal explant culture**

604 To assess the effects of D- and L-cis-diltiazem on calpain activity and photoreceptor  
605 degeneration, *rd1* retinas were explanted at post-natal day (P) 5, while retinas from  
606 more slowly degenerating *rd10* animals were explanted at P9. The explants were  
607 cultured on a polycarbonate membrane (Corning-Costar Transwell permeable support,  
608 24 mm insert, #CLS3412) with complete medium (Gibco R16 medium with  
609 supplements) (72). The R16 medium was exchanged every two days with treatment  
610 added at either P7 and P9, for *rd1*, or at P11, P13, P15 for *rd10* explants. The cultures  
611 were treated with 25, 50, and 100  $\mu\text{M}$  of D- and L-cis-diltiazem, respectively. Cultures  
612 were ended on P11 (*rd1*) and P17 (*rd10*) by fixing the cultures with 4%  
613 paraformaldehyde (PFA). The explants were embedded in Tissuetek (Sakura Finetek  
614 Europe B.V.) and sectioned (12  $\mu\text{m}$ ) in a cryostat (ThermoFisher Scientific, CryoStar  
615 NX50 OVP, Runcorn UK).

### 616 **TUNEL staining**

617 The TUNEL (terminal deoxynucleotidyl transferase dUTP nick end labelling) assay  
618 kit (Roche Diagnostics, Mannheim, Germany) was used to label dying cells.  
619 Histological sections from retinal explants were dried and stored at  $-20^\circ\text{C}$ . The sections  
620 were rehydrated with phosphate-buffered saline (PBS; 0.1M) and incubated with  
621 Proteinase K (1.5  $\mu\text{g}/\mu\text{l}$ ) diluted in 50 mM TRIS-buffered saline (TBS; 1  $\mu\text{l}$  enzyme in 7  
622 ml TBS) for 5 mins. This was followed by 3 times 5 minutes TBS washing and  
623 incubation with a mixture of 30% HCl and 70% ethanol for 5 min to increase the  
624 accessibility of cells to the enzyme. Another 3 times 5 minutes washing was followed  
625 by incubation with blocking solution (10% normal goat serum, 1% bovine serum



626 albumin, 1% fish gelatine in phosphate-buffered saline with 0.03% Tween-20). TUNEL  
627 staining solution was prepared using 10 parts of blocking solution, 9 parts of TUNEL  
628 labelling solution and 1 part of TUNEL enzyme. After blocking, the sections were  
629 incubated with TUNEL staining solution overnight at 4° C. Finally, the sections were  
630 washed 2 times with PBS, mounted using Vectashield with DAPI (Vector Laboratories  
631 Inc, Burlingame, CA, USA) and imaged under a Zeiss (ApoTome.2) microscope for  
632 further analysis.

### 633 **Calpain-activity assay**

634 This assay allows resolving overall calpain activity *in situ*, on unfixed tissue sections  
635 [14]. Retinal tissue sections were incubated and rehydrated for 15 minutes in calpain  
636 reaction buffer (CRB) (5.96 g HEPES, 4.85 g KCl, 0.47 g MgCl<sub>2</sub>, 0.22 g CaCl<sub>2</sub> in 100 ml  
637 ddH<sub>2</sub>O; pH 7.2) with 2 mM dithiothreitol (DTT). The tissue sections were incubated for 2  
638 hours at 37°C in CRB with tBOC-Leu-Met-CMAC (5 µM; Thermofisher Scientific,  
639 A6520). Afterwards, the tissue sections were washed twice in PBS (5 minutes) and  
640 mounted using Vectashield mounting medium (Vector) for immediate visualization  
641 under the ZEISS ApoTome2.

### 642 **Immunohistochemistry**

643 The cryo-sectioned slides were dried for 30 minutes at 37°C and hydrated for 15  
644 minutes. The sections were then incubated with blocking solution (10% NGS, 1% BSA  
645 and 0.3% PBST) for one hour. The primary antibodies CNGB1 (Sigma-Aldrich,  
646 HPA039159; 1:1000), calpain-2 (Abcam, ab39165; 1:300), or caspase-3 (Cell  
647 Signalling, 9664; 1:1000) were diluted in blocking solution and incubated overnight at  
648 4°C. Rinsing with PBS for 3 times 10 minutes each was followed by incubation with  
649 secondary antibody (Molecular Probes, AlexaFluor488 (A01134) or AlexaFluor562  
650 (A11036), diluted 1:500 in PBS) for one hour. The sections were further rinsed with  
651 PBS for 3 times 10 minutes each and mounted with Vectashield containing DAPI  
652 (Vector).

### 653 **Microscopy and image analysis in retinal cultures**

654 The images of *ex vivo* retina and organotypic explant cultures were captured using a  
655 Zeiss Imager Z.2 fluorescence microscope, equipped with ApoTome2, an Axiocam 506  
656 mono camera, and HXP-120V fluorescent lamp (Carl Zeiss Microscopy, Oberkochen,  
657 Germany). The excitation ( $\lambda_{Exc.}$ ) / emission ( $\lambda_{Em.}$ ) characteristics of the filter sets used  
658 for the different fluorophores were as follows (in nm): DAPI ( $\lambda_{Exc.} = 369\text{ nm}$ ,  $\lambda_{Em.} =$

659 465 nm), AF488 ( $\lambda_{Exc.} = 490 \text{ nm}$ ,  $\lambda_{Em.} = 525 \text{ nm}$ ), and AF562 ( $\lambda_{Exc.} = 578 \text{ nm}$ ,  $\lambda_{Em.} =$   
660 603 nm). The Zen 2.3 blue edition software (Zeiss) was used to capture images (both  
661 tiled and z-stack, 20x magnification). The data were collected from 7-9 different  
662 sections obtained from 3-5 animals. Sections of 12  $\mu\text{m}$  thickness were analysed using  
663 8-12 Apotome Z-planes. The positive cells in the ONL were manually quantified, the  
664 ONL area was measured in Zen 2.3 software. The total number of cells in the ONL was  
665 calculated using an average cell (nucleus) size and the percent positive cells was  
666 determined with respect to the total number of cells in the same ONL area. Values  
667 were normalized to control condition (100%).

668 The relative localization of positive cells within the ONL was assessed by dividing  
669 the width of the ONL horizontally into two equal halves (*i.e.* upper and lower half) and  
670 manually quantifying the distribution of positive cells in each of the halves. The chance  
671 level for cell distribution was 50%. The percent of degenerating photoreceptors  
672 localized close to OPL, were analysed by comparing cell count in the lower half of ONL  
673 to total positive cells in the ONL.

#### 674 **Statistical analysis for retinal cultures**

675 Linear mixed-effects models were fitted by restricted maximum likelihood estimation  
676 (REML), to assess the significance of the effects in explaining the variations of the  
677 dependent variables. Variance inflation factors (VIF) of the predictor variables were  
678 calculated and assured to fall well below the common threshold value, indicating no  
679 collinearity between them (73). The residuals were confirmed visually to follow a normal  
680 distribution, while homoscedasticity (homogeneity of the residual variances) was tested  
681 using the Brown–Forsythe test (74) and reported in case of violations.

682 Figures were prepared using Photoshop CS5 (Adobe, San Jose, CA, USA).  
683 Statistical analysis and graph preparation were performed using JMP 15.2.0 (466311,  
684 SAS Institute Inc, Cary, NC, USA).

#### 685 **Two-photon $\text{Ca}^{2+}$ imaging**

686 Light stimulus-evoked  $\text{Ca}^{2+}$  responses were recorded in cone axon terminals using a  
687 two-photon (2P) microscope, as previously described (75). In brief, we used adult  
688 transgenic HR2.1:TN-XL mice (for details, see above). After dark adaptation for  $\geq 1$   
689 hour (13), the animal was deeply anesthetized with isoflurane (CP-Pharma, Germany),  
690 and then sacrificed by cervical dislocation. All procedures were performed under dim  
691 red illumination. Following enucleation of the eyes, the retinas were dissected and

692 vertically sliced (~200  $\mu\text{m}$ ) in artificial cerebral spinal fluid (ACSF), which contained (in  
693 mM): 125 NaCl, 2.5 KCl, 2 CaCl<sub>2</sub>, 1 MgCl<sub>2</sub>, 1.25 NaH<sub>2</sub>PO<sub>4</sub>, 26 NaHCO<sub>3</sub>, 0.5 L-  
694 glutamine, and 20 glucose (Sigma-Aldrich or Merck, Germany) and was maintained at  
695 pH 7.4 with carboxygen (95% O<sub>2</sub>, 5% CO<sub>2</sub>). Next, the slices were transferred to the 2P  
696 microscope's recording chamber and superfused with warmed (37°C) ACSF.

697 The 2P microscope, a customized MOM (Sutter Instruments, Novato, USA; (76),  
698 was driven by a mode-locked Ti:Sapphire laser (MaiTai-HP DeepSee; Newport  
699 Spectra-Physics, Darmstadt, Germany) tuned to 860 nm. For further technical details  
700 on the 2P setup configuration, see (75). TN-XL is a ratiometric FRET-based Ca<sup>2+</sup>  
701 indicator (61), therefore we used two detection channels with the appropriate band-  
702 pass (BP) filters (483 BP 32; 535 BP 50; AHF, Tübingen, Germany) to capture both the  
703 sensor's donor ( $F_D$ ; ECFP) and acceptor fluorescence ( $F_A$ ; citrine) simultaneously. The  
704 relative Ca<sup>2+</sup> level in the cone terminals was then represented by the ratio  $F_A/F_D$  (*cf.*  
705 Fig. 4b, c). Light stimuli were presented using a custom-built stimulator (77) with two  
706 band-pass filtered LEDs (UV filter: 360 BP 12; green: 578 BP 10; AHF) mounted below  
707 the recording chamber.

708 Before presenting light flashes and recording cone Ca<sup>2+</sup> signals, slices were  
709 adapted to a constant background illumination equivalent to a photoisomerisation rate  
710 of ~10<sup>4</sup> P\*/cone s<sup>-1</sup> for  $\geq 15$  seconds. Light stimuli consisted of a series of 1-s bright  
711 flashes at 0.25 Hz, evoking similar photoisomerisation rates (~6.5·10<sup>3</sup> P\*s<sup>-1</sup>/cone) in  
712 both mouse cone types.

713 Stock solutions (100mM) of D- and L-cis-diltiazem were prepared in distilled water  
714 and stored at 4°C. Prior to each experiment, D- or L-cis-diltiazem dilutions were freshly  
715 prepared from the stock in carboxygenated ACSF solution. For bath application, the  
716 tissue was perfused with D- or L-cis-diltiazem (25, 50, or 100  $\mu\text{M}$ ) added to the bathing  
717 solution for  $\geq 1$  minute before commencing the recording; the perfusion rate was of  
718 ~1.5 ml/minute. Drug entry into the recording chamber was confirmed by adding  
719 Sulforhodamine 101 (Sigma-Aldrich) to the drug solution.

## 720 **Analysis of Ca<sup>2+</sup>-imaging data**

721 To identify the factors (*i.e.* L-cis vs. D-cis, concentration) that are significant for  
722 predicting the response of a cell during drug treatment (a potential change in AUC), we  
723 applied a multivariate linear model (78). The importance of each factor was estimated  
724 as its impact on the predictive power of the statistical model. The effect of each factor  
725 was considered both individually and in interactions with the other variables, to identify

726 which factor or group of factors is best at modelling the AUC values. The explanatory  
727 variables were standardised prior to model fitting, by subtracting the mean and dividing  
728 by the standard deviation of the variable. As before, the statistical assumptions of the  
729 linear model were evaluated. The VIF for each explanatory variable was found to fall  
730 below the common threshold, indicating a lower level of multicollinearity. Visual  
731 inspection showed that the residuals were approximately normally distributed. A Brown-  
732 Forsythe test indicated that there was heteroscedasticity in the data, though as  
733 previously noted these models are robust to such variability. The model also  
734 incorporated a random effects term for the recording field, which controlled for  
735 recordings where the ROIs were on average higher or lower than the mean across all  
736 ROIs in all recordings. Specifically, the modelling showed that (1) more active cells  
737 (higher AUC) were more sensitive to the drug application, (2) there was a statistically  
738 significant difference between the effects of L- and D-cis- diltiazem on the AUC, and (3)  
739 the drug concentration also had a significant effect on AUC.

740 The effect size is determined using the method for estimating semi-partial R-squared  
741 (SPRS) (78) and allowed us to compare the relative impact of each factor in the linear  
742 mixed effects model (Table S5). This method also allowed us to evaluate the fit for the  
743 whole model (SPRS = 0.368).

744

#### 745 **Supplementary Information**

746 The manuscript includes six Supplementary Figures and eight Supplementary  
747 Tables.

748

#### 749 **REFERENCES**

750 1. Kennan A, Aherne A, Humphries P. Light in retinitis pigmentosa. *Trends Genet* **21**, 103-  
751 110 (2005)

752 2. Narayan DS, Wood JP, Chidlow G, Casson RJ. A review of the mechanisms of cone  
753 degeneration in retinitis pigmentosa. *Acta Ophthalmol* **94**,748-754 (2016)

754 3. Hamel CP. Cone rod dystrophies. *Orphanet J Rare Dis* **2**, 7 (2007)

755 4. Das S, Chen Y, Yan J, Christensen G, Belhadj S, Tolone A, et al. The role of cGMP-  
756 signalling and calcium-signalling in photoreceptor cell death: perspectives for therapy  
757 development. *Pflugers Arch* (2021)

758 5. Barabas P, Cutler PC, Krizaj D. Do calcium channel blockers rescue dying photoreceptors  
759 in the Pde6b ( rd1 ) mouse? *Adv Exp Med Biol* **664**, 491-499 (2010)

- 760 6. Wetzel RK, Arystarkhova E, Sweadner KJ. Cellular and Subcellular Specification of Na,K-  
761 ATPase  $\alpha$  and  $\beta$  Isoforms in the Postnatal Development of Mouse Retina. *J Neurosci* **19**, 9878-  
762 9889 (1999)
- 763 7. Waldner DM, Bech-Hansen NT, Stell WK. Channeling Vision: Ca(V)1.4-A Critical Link in  
764 Retinal Signal Transmission. *BioMed Res Int* **7**, 1-14 (2018)
- 765 8. Ingram NT, Sampath AP, Fain GL. Membrane conductances of mouse cone  
766 photoreceptors. *J Gen Physiol* **152**, (2020)
- 767 9. Paquet-Durand F, Beck S, Michalakis S, Goldmann T, Huber G, Muhlfriedel R, et al. A key  
768 role for cyclic nucleotide gated (CNG) channels in cGMP-related retinitis pigmentosa. *Hum Mol*  
769 *Genet* **20**, 941-947 (2011)
- 770 10. Fox DA, Poblenz AT, He LH. Calcium overload triggers rod photoreceptor apoptotic cell  
771 death in chemical-induced and inherited retinal degenerations. *Ann Ny Acad Sci* **893**, 282-285  
772 (1999)
- 773 11. Vallazza-Deschamps G, Cia D, Gong J, Jellali A, Duboc A, Forster V, et al. Excessive  
774 activation of cyclic nucleotide-gated channels contributes to neuronal degeneration of  
775 photoreceptors. *Eur J Neurosci* **22**, 1013-1022 (2005)
- 776 12. Bowes C, Li T, Frankel WN, Danciger M, Coffin JM, Applebury ML, et al. Localization of a  
777 retroviral element within the rd gene coding for the beta subunit of cGMP phosphodiesterase.  
778 *PNAS* **90**, 2955-2959 (1993)
- 779 13. Wei T, Schubert T, Paquet-Durand F, Tanimoto N, Chang L, Koeppen K, et al. Light-  
780 driven calcium signals in mouse cone photoreceptors. *J Neurosci* **32**, 6981-6994 (2012)
- 781 14. Kulkarni M, Trifunovic D, Schubert T, Euler T, Paquet-Durand F. Calcium dynamics  
782 change in degenerating cone photoreceptors. *Hum Mol Genet* **25**, 3729-3740 (2016)
- 783 15. Schon C, Paquet-Durand F, Michalakis S. Cav1.4 L-Type Calcium Channels Contribute to  
784 Calpain Activation in Degenerating Photoreceptors of rd1 Mice. *PLoS One* **11**, e0156974 (2016)
- 785 16. Sothilingam V, Garcia-Garrido M, Jiao K, Buena-Atienza E, Sahaboglu A, Trifunovic D, et  
786 al. Retinitis Pigmentosa: Impact of different Pde6a point mutations on the disease phenotype.  
787 *Hum Mol Genet* **24**, 5486-5499 (2015)
- 788 17. Hart J, Wilkinson MF, Kelly ME, Barnes S. Inhibitory action of diltiazem on voltage-gated  
789 calcium channels in cone photoreceptors. *Exp Eye Res* **76**, 597-604 (2003)
- 790 18. Stern JH, Kaupp UB, MacLeish PR. Control of the light-regulated current in rod  
791 photoreceptors by cyclic GMP, calcium, and l-cis-diltiazem. *PNAS* **83**, 1163-1167 (1986)
- 792 19. Frasson M, Sahel JA, Fabre M, Simonutti M, Dreyfus H, Picaud S. Retinitis pigmentosa:  
793 rod photoreceptor rescue by a calcium-channel blocker in the rd mouse. *Nat Med* **5**, 1183-1187  
794 (1999).

- 795 20. Fox DA, Poblenz AT, He L, Harris JB, Medrano CJ. Pharmacological strategies to block  
796 rod photoreceptor apoptosis caused by calcium overload: a mechanistic target-site approach  
797 to neuroprotection. *Eur J Ophthalmol* **13**, 44-56 (2003)
- 798 21. Pawlyk BS, Sandberg MA, Berson EL. Effects of IBMX on the rod ERG of the isolated  
799 perfused cat eye: antagonism with light, calcium or L-cis-diltiazem. *Vision Res* **31**, 1093-1097  
800 (1991)
- 801 22. Pearce-Kelling SE, Aleman TS, Nickle A, Laties AM, Aguirre GD, Jacobson SG, et al.  
802 Calcium channel blocker D-cis-diltiazem does not slow retinal degeneration in the PDE6B  
803 mutant rcd1 canine model of retinitis pigmentosa. *Mol Vis* **7**, 42-47 (2001)
- 804 23. Pawlyk BS, Li T, Scimeca MS, Sandberg MA, Berson EL. Absence of photoreceptor rescue  
805 with D-cis-diltiazem in the rd mouse. *Invest Ophthalmol Vis Sci* **43**, 1912-1915 (2002)
- 806 24. Shuart NG, Haitin Y, Camp SS, Black KD, Zagotta WN. Molecular mechanism for 3:1  
807 subunit stoichiometry of rod cyclic nucleotide-gated ion channels. *Nat Commun* **2**, 457 (2011)
- 808 25. Peng C, Rich ED, Varnum MD. Subunit configuration of heteromeric cone cyclic  
809 nucleotide-gated channels. *Neuron* **42**, 401-410 (2004)
- 810 26. Cote RH, Brunnock MA. Intracellular cGMP concentration in rod photoreceptors is  
811 regulated by binding to high and moderate affinity cGMP binding sites. *J Biol Chem* **268**, 17190-  
812 17198 (1993)
- 813 27. Nakatani K, Yau KW. Calcium and light adaptation in retinal rods and cones. *Nature* **334**,  
814 69-71 (1988)
- 815 28. Frings S, Seifert R, Godde M, Kaupp UB. Profoundly different calcium permeation and  
816 blockage determine the specific function of distinct cyclic nucleotide-gated channels. *Neuron*  
817 **15**, 169-179 (1995)
- 818 29. Picones A, Korenbrot JI. Permeability and interaction of Ca<sup>2+</sup> with cGMP-gated ion  
819 channels differ in retinal rod and cone photoreceptors. *Biophys J* **69**, 120-127 (1995)
- 820 30. Nache V, Eick T, Schulz E, Schmauder R, Benndorf K. Hysteresis of ligand binding in  
821 CNGA2 ion channels. *Nat Commun* **4**, 2866 (2013)
- 822 31. Biskup C, Kusch J, Schulz E, Nache V, Schwede F, Lehmann F, et al. Relating ligand  
823 binding to activation gating in CNGA2 channels. *Nature* **446**, 440-443 (2007)
- 824 32. Nache V, Wongsamitkul N, Kusch J, Zimmer T, Schwede F, Benndorf K. Deciphering the  
825 function of the CNGB1b subunit in olfactory CNG channels. *Sci Rep* **6**, 29378 (2016)
- 826 33. Arango-Gonzalez B, Trifunović D, Sahaboglu A, Kranz K, Michalakis S, Farinelli P, et al.  
827 Identification of a common non-apoptotic cell death mechanism in hereditary retinal  
828 degeneration. *PLoS One* **9**, e112142 (2014)
- 829 34. Powers TA, Rogin C. MarkeTrak 10: History and Methodology. *Semin Hear* **41**, 3-5  
830 (2020)

- 831 35. Nicholson DW, Ali A, Thornberry NA, Vaillancourt JP, Ding CK, Gallant M, et al.  
832 Identification and inhibition of the ICE/CED-3 protease necessary for mammalian apoptosis.  
833 *Nature* **376**, 37-43 (1995)
- 834 36. Vighi E, Trifunovic D, Veiga-Crespo P, Rentsch A, Hoffmann D, Sahaboglu A, et al.  
835 Combination of cGMP analogue and drug delivery system provides functional protection in  
836 hereditary retinal degeneration. *PNAS* **115**, E2997-E3006 (2018)
- 837 37. Bocchero U, Tam BM, Chiu CN, Torre V, Moritz OL. Electrophysiological Changes During  
838 Early Steps of Retinitis Pigmentosa. *Invest Ophthalmol Vis Sci* **60**, 933-943 (2019)
- 839 38. Haynes LW. Block of the cyclic GMP-gated channel of vertebrate rod and cone  
840 photoreceptors by l-cis-diltiazem. *J Gen Physiol* **100**, 783-801 (1992)
- 841 39. McLatchie LM, Matthews HR. Voltage-dependent block by L-cis-diltiazem of the cyclic  
842 GMP-activated conductance of salamander rods. *Proc Biol Sci* **247**, 113-119 (1992)
- 843 40. Tang L, Gamal El-Din TM, Lenaeus MJ, Zheng N, Catterall W. Structural Basis for  
844 Diltiazem Block of a Voltage-gated Ca<sup>2+</sup> Channel. *Mol Pharmacol* **96**, 485-492 (2019)
- 845 41. Zhao Y, Huang G, Wu J, Wu Q, Gao S, Yan Z, et al. Molecular Basis for Ligand  
846 Modulation of a Mammalian Voltage-Gated Ca(2+) Channel. *Cell* **177**, 1495-1506 (2019)
- 847 42. Zheng X, Fu Z, Su D, Zhang Y, Li M, Pan Y, et al. Mechanism of ligand activation of a  
848 eukaryotic cyclic nucleotide-gated channel. *Nat Struct Mol Biol* **27**, 625-634 (2020)
- 849 43. Xue J, Han Y, Zeng W, Wang Y, Jiang Y. Structural mechanisms of gating and selectivity  
850 of human rod CNGA1 channel. *Neuron* **109**, 1302-1313 (2021)
- 851 44. Fain GL, Lisman JE. Light, Ca<sup>2+</sup>, and photoreceptor death: new evidence for the  
852 equivalent-light hypothesis from arrestin knockout mice. *Invest Ophthalmol Vis Sci* **40**, 2770-  
853 2772 (1999)
- 854 45. Olshevskaya EV, Ermilov AN, Dizhoor AM. Factors that affect regulation of cGMP  
855 synthesis in vertebrate photoreceptors and their genetic link to human retinal degeneration.  
856 *Mol Cell Biochem* **230**, 139-147 (2002)
- 857 46. Johnson JE, Jr., Perkins GA, Giddabasappa A, Chaney S, Xiao W, White AD, et al.  
858 Spatiotemporal regulation of ATP and Ca<sup>2+</sup> dynamics in vertebrate rod and cone ribbon  
859 synapses. *Mol Vis* **13**, 887-919 (2007)
- 860 47. Ames A, III. Energy requirements of CNS cells as related to their function and to their  
861 vulnerability to ischemia: a commentary based on studies on retina. *Can J Physiol Pharmacol*  
862 **70**, S158-S64 (1992)
- 863 48. Wegierski T, Kuznicki J. Neuronal calcium signaling via store-operated channels in  
864 health and disease. *Cell Calcium* **74**, 102-111 (2018)
- 865 49. Johnson MT, Gudlur A, Zhang X, Xin P, Emrich SM, Yoast RE, et al. L-type Ca<sup>2+</sup>; channel  
866 blockers promote vascular remodeling through activation of STIM proteins. *PNAS* **117**, 17369  
867 (2020)

- 868 50. Saraiva N, Prole DL, Carrara G, Johnson BF, Taylor CW, Parsons M, et al. hGAAP  
869 promotes cell adhesion and migration via the stimulation of store-operated Ca<sup>2+</sup> entry and  
870 calpain 2. *J Cell Biol* **202**, 699-713 (2013)
- 871 51. Olshevskaya EV, Ermilov AN, Dizhoor AM. Factors that affect regulation of cGMP  
872 synthesis in vertebrate photoreceptors and their genetic link to human retinal degeneration.  
873 *Mol Cell Biochem* **230**, 139-147 (2002)
- 874 52. Paquet-Durand F, Hauck SM, van Veen T, Ueffing M, Ekström P. PKG activity causes  
875 photoreceptor cell death in two retinitis pigmentosa models. *J Neurochem* **108**, 796-810 (2009)
- 876 53. Power M, Das S, Schutze K, Marigo V, Ekstrom P, Paquet-Durand F. Cellular mechanisms  
877 of hereditary photoreceptor degeneration - Focus on cGMP. *Prog Retin Eye Res* **74**, 100772  
878 (2020)
- 879 54. Krizaj D, Copenhagen DR. Compartmentalization of calcium extrusion mechanisms in  
880 the outer and inner segments of photoreceptors. *Neuron* **21**, 249-256 (1998)
- 881 55. Spencer M, Detwiler PB, Bunt-Milam AH. Distribution of membrane proteins in  
882 mechanically dissociated retinal rods. *Invest Ophthalmol Vis Sci* **29**, 1012-1020 (1988)
- 883 56. Koch S, Sothilingam V, Garcia Garrido M, Tanimoto N, Becirovic E, Koch F, et al. Gene  
884 therapy restores vision and delays degeneration in the CNGB1(-/-) mouse model of retinitis  
885 pigmentosa. *Hum Mol Genet* **21**, 4486-4496 (2012)
- 886 57. Bareil C, Hamel CP, Delague V, Arnaud B, Demaille J, Claustres M. Segregation of a  
887 mutation in CNGB1 encoding the beta-subunit of the rod cGMP-gated channel in a family with  
888 autosomal recessive retinitis pigmentosa. *Hum Genet* **108**, 328-334 (2001)
- 889 58. Wissinger B, Gamer D, Jägle H, Giorda R, Marx T, Mayer S, et al. CNGA3 mutations in  
890 hereditary cone photoreceptor disorders. *Am J Hum Genet* **69**, 722-737 (2001)
- 891 59. Wutz K, Sauer C, Zrenner E, Lorenz B, Alitalo T, Broghammer M, et al. Thirty distinct  
892 CACNA1F mutations in 33 families with incomplete type of XLCSNB and Cacna1f expression  
893 profiling in mouse retina. *Eur J Hum Genet* **10**, 449-456 (2002)
- 894 60. Sanyal S, Bal AK. Comparative light and electron microscopic study of retinal  
895 histogenesis in normal and rd mutant mice. *Z Anat Entwicklungsgesch* **142**, 219-238 (1973)
- 896 61. Mank M, Reiff DF, Heim N, Friedrich MW, Borst A, Griesbeck O. A FRET-Based Calcium  
897 Biosensor with Fast Signal Kinetics and High Fluorescence Change. *Biophys J* **90**, 1790-1796  
898 (2006)
- 899 62. Kaupp UB, Niidome T, Tanabe T, Terada S, Bonigk W, Stuhmer W, et al. Primary  
900 structure and functional expression from complementary DNA of the rod photoreceptor cyclic  
901 GMP-gated channel. *Nature* **342**, 762-766 (1989)
- 902 63. Korsch HG, Illing M, Seifert R, Sesti F, Williams A, Gotzes S, et al. A 240 kDa protein  
903 represents the complete beta subunit of the cyclic nucleotide-gated channel from rod  
904 photoreceptor. *Neuron* **15**, 627-636 (1995)



- 905 64. Yu WP, Grunwald ME, Yau KW. Molecular cloning, functional expression and  
906 chromosomal localization of a human homolog of the cyclic nucleotide-gated ion channel of  
907 retinal cone photoreceptors. *FEBS Lett* **393**, 211-215 (1996)
- 908 65. Peng C, Rich ED, Thor CA, Varnum MD. Functionally important calmodulin-binding sites  
909 in both NH<sub>2</sub>- and COOH-terminal regions of the cone photoreceptor cyclic nucleotide-gated  
910 channel CNGB3 subunit. *J Biol Chem* **278**, 24617-24623 (2003)
- 911 66. Liman ER, Tytgat J, Hess P. Subunit stoichiometry of a mammalian K<sup>+</sup> channel  
912 determined by construction of multimeric cDNAs. *Neuron* **9**, 861-871 (1992)
- 913 67. Shammat IM, Gordon SE. Stoichiometry and arrangement of subunits in rod cyclic  
914 nucleotide-gated channels. *Neuron* **23**, 809-819 (1999)
- 915 68. Jonas P. High-speed solution switching using piezo-based micropositioning stages. In:  
916 Sakmann B, Neher E (eds) Single-channel recording. 2nd edn. (Springer US, Plenum Press, New  
917 York 1995) pp xxii-700
- 918 69. Thon S, Schulz E, Kusch J, Benndorf K. Conformational Flip of Nonactivated HCN2  
919 Channel Subunits Evoked by Cyclic Nucleotides. *Biophys J* **109**, 2268-2276 (2015)
- 920 70. Zheng J, Zagotta WN. Patch-clamp fluorometry recording of conformational  
921 rearrangements of ion channels. *Sci STKE* **2003**, PL7 (2003)
- 922 71. Nache V, Zimmer T, Wongsamitkul N, Schmauder R, Kusch J, Reinhardt L, et al.  
923 Differential regulation by cyclic nucleotides of the CNGA4 and CNGB1b subunits in olfactory  
924 cyclic nucleotide-gated channels. *Sci Signal* **5**, ra48 (2012)
- 925 72. Belhadj S, Tolone A, Christensen G, Das S, Chen Y, Paquet-Durand F. Long-Term, Serum-  
926 Free Cultivation of Organotypic Mouse Retina Explants with Intact Retinal Pigment Epithelium.  
927 *J Vis Exp*, e61868 (2020)
- 928 73. Hair JF, Anderson RE, Tatham RL, Black W. Multivariate data analysis New York. NY:  
929 Macmillan. (1995)
- 930 74. Nobre JS, da Motta Singer J. Residual analysis for linear mixed models. *Biom J* **49**, 863-  
931 875 (2007)
- 932 75. Kulkarni M, Schubert T, Baden T, Wissinger B, Euler T, Paquet-Durand F. Imaging Ca<sup>2+</sup>  
933 dynamics in cone photoreceptor axon terminals of the mouse retina. *J Vis Exp*, e52588 (2015)
- 934 76. Euler T, Hausselt SE, Margolis DJ, Breuninger T, Castell X, Detwiler PB, et al. Eyecup  
935 scope--optical recordings of light stimulus-evoked fluorescence signals in the retina. *Pflugers*  
936 *Arch* **457**, 393-414 (2009)
- 937 77. Baden T, Schubert T, Chang L, Wei T, Zaichuk M, Wissinger B, et al. A Tale of Two  
938 Retinal Domains: Near-Optimal Sampling of Achromatic Contrasts in Natural Scenes through  
939 Asymmetric Photoreceptor Distribution. *Neuron* **80**, 1206-1217 (2013)
- 940 78. Nakagawa S, Schielzeth H. A general and simple method for obtaining R<sup>2</sup> from  
941 generalized linear mixed-effects models. *Methods Ecol Evol* **4**, 133-142 (2013)

- 942 79. Schielzeth H, Dingemanse NJ, Nakagawa S, Westneat DF, Alague H, Teplitsky C, et al.  
943 Robustness of linear mixed-effects models to violations of distributional assumptions. *Methods*  
944 *Ecol Evol* **11**, 1141-1152 (2020)
- 945

946 **ACKNOWLEDGEMENTS**

947 We thank N. Rieger from the Tübingen Institute for Ophthalmic Research as well as  
948 K. Schoknecht, S. Bernhardt, A. Kolchmeier from Institute of Physiology II (Jena) for  
949 technical assistance. We also thank J. Kusch and K. Benndorf (Institut of Physiology II,  
950 Jena) for excellent comments on the manuscript. This work was funded by the  
951 ProRetina Foundation and the Deutsche Forschungsgemeinschaft (DFG, German  
952 Research Foundation; PA1751/7-1, 8-1 to FPD; EU42/8-1 to TE; TRR 166  
953 ReceptorLight project B01 and Project Number 437036164 to VN).

954 The authors declare no competing financial interests. FS is General Manager  
955 Operations and Head of R & D at Biolog Life Science Institute GmbH & Co. KG. FPD is  
956 Chief Scientific Officer for Mireca Medicines GmbH.

957 **Author contributions**

958 S. Das performed retinal explant cultures, TUNEL and immunostaining, microscopy,  
959 analysed data and helped write the manuscript; M. Power performed Ca<sup>2+</sup>-imaging  
960 experiments; V. Pop studied the effect of diltiazem on CNGC gating kinetics; K.  
961 Groeneveld performed colocalization experiments for heterotetrameric CNGCs; C.  
962 Melle performed molecular-biology work; M. Achury performed immunostaining and  
963 analysed data; L. Rogerson analysed Ca<sup>2+</sup>-imaging data and performed statistical  
964 analysis; T. Strasser performed statistical analysis on immune- and bioassay data; F.  
965 Schwede synthesized fluorescent cGMP derivatives; V. Nache performed  
966 electrophysiological and optical measurements to study the effect of diltiazem on  
967 CNGC; V. Nache, T. Euler, and F. Paquet-Durand designed the experiments,  
968 interpreted the data, and prepared the manuscript. All authors edited the manuscript.

969

970

971

972

973

974

975

976

977

978

979

## Supplementary Information

980 **Das *et al.***: Redefining the role of Ca<sup>2+</sup>-permeable channels in photoreceptor  
981 degeneration using diltiazem.

982

983 **Supplementary Figures – 1 to 6**

984 **Supplementary Tables – 1 to 8**

985

986

### Supplementary Figures

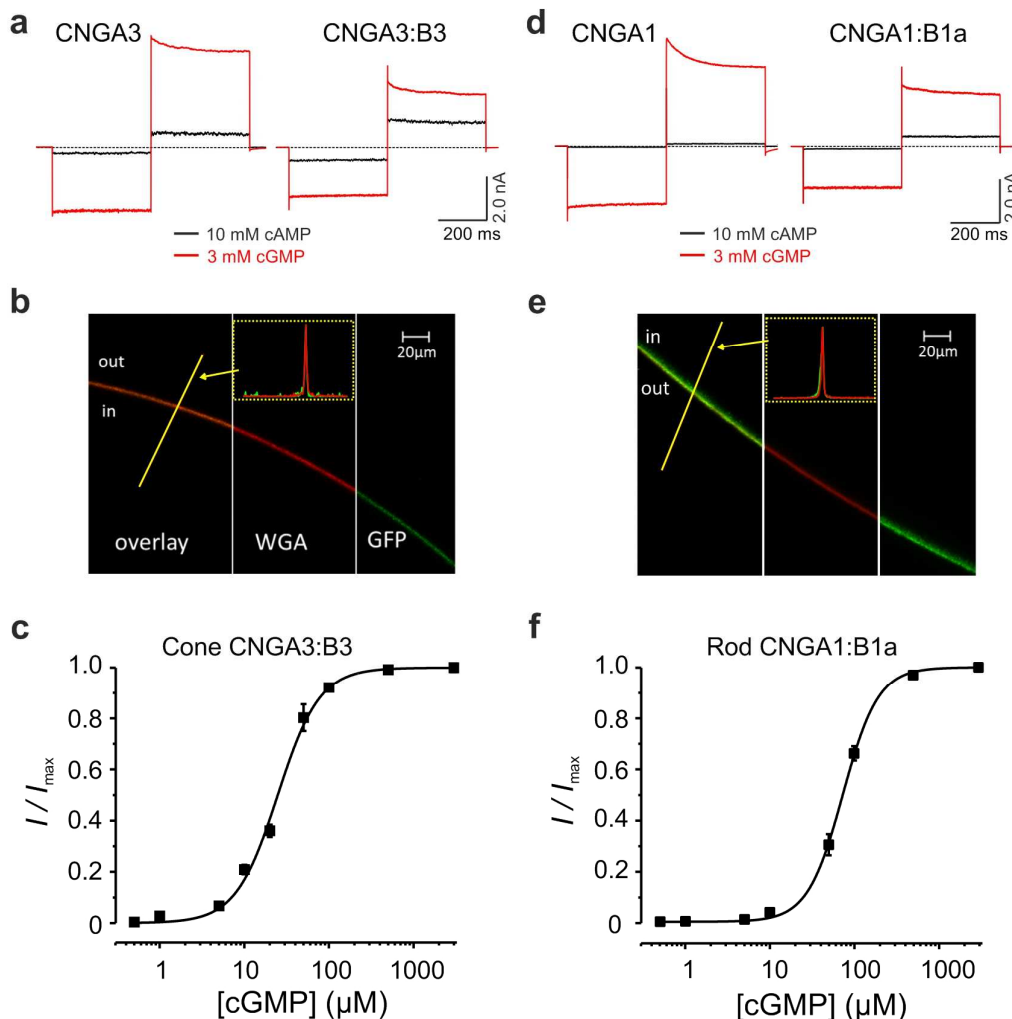

987

988 **Figure S1: Functional properties of photoreceptor heterotetrameric CNGCs**  
989 **expressed in *Xenopus laevis* oocytes.** Representative macroscopic cone (a) and rod  
990 (d) CNGC-current traces from inside-out membrane patches in the presence of 3 mM  
991 cGMP (red) and 10 mM cAMP (black). The current traces were elicited by voltage steps  
992 from a holding potential of 0 mV to -100, +100 and 0 mV. Leak currents in the absence  
993 of cGMP were subtracted for all recordings. For CNGA3 channels the ratio  $I_{cAMP}/I_{cGMP}$   
994 was  $0.15 \pm 0.01$  (n=8). CNGB3-subunit incorporation into the CNGA3:B3 channel leads  
995 to a significant increase in the cAMP efficacy ( $I_{cAMP}/I_{cGMP} = 0.42 \pm 0.03$ , n=6). Similarly, for  
996 CNGA1 channels the ratio  $I_{cAMP}/I_{cGMP}$  was  $0.019 \pm 0.005$  (n=12), whereas for  
997 heterotetrameric CNGA1:B1a channels the ratio was  $0.16 \pm 0.02$  (n=6). (b, e)  
998 Representative measurements showing confocal images of oocyte membrane

999 expressing heterotetrameric CNGA3:B3-GFP (**b**) and CNGA1:B1a-GFP (**e**) channels  
1000 (green fluorescence signal). The oocyte plasma membrane was labelled with Alexa  
1001 Fluor™ 633 WGA (red fluorescence signal). The small insets show fluorescence  
1002 profiles along the yellow line, perpendicular to the membrane and confirm the  
1003 colocalization of the labelled channels with the oocyte membrane. For each channel  
1004 isoform we tested more than 10 oocytes from at least two different oocyte batches. (**c**,  
1005 **f**) cGMP-dependent concentration-activation relationships for cone CNGA3:B3 (**c**) and  
1006 rod CNGA1:B1a (**f**) channels obtained at -35 mV. The currents triggered by  
1007 subsaturating ligand concentrations were normalized with respect to the maximal  
1008 current at 3 mM cGMP. The experimental data points, each representing the mean of 5  
1009 to 10 measurements, were fitted with Eq. (1) (see also Table S1).  
1010

---

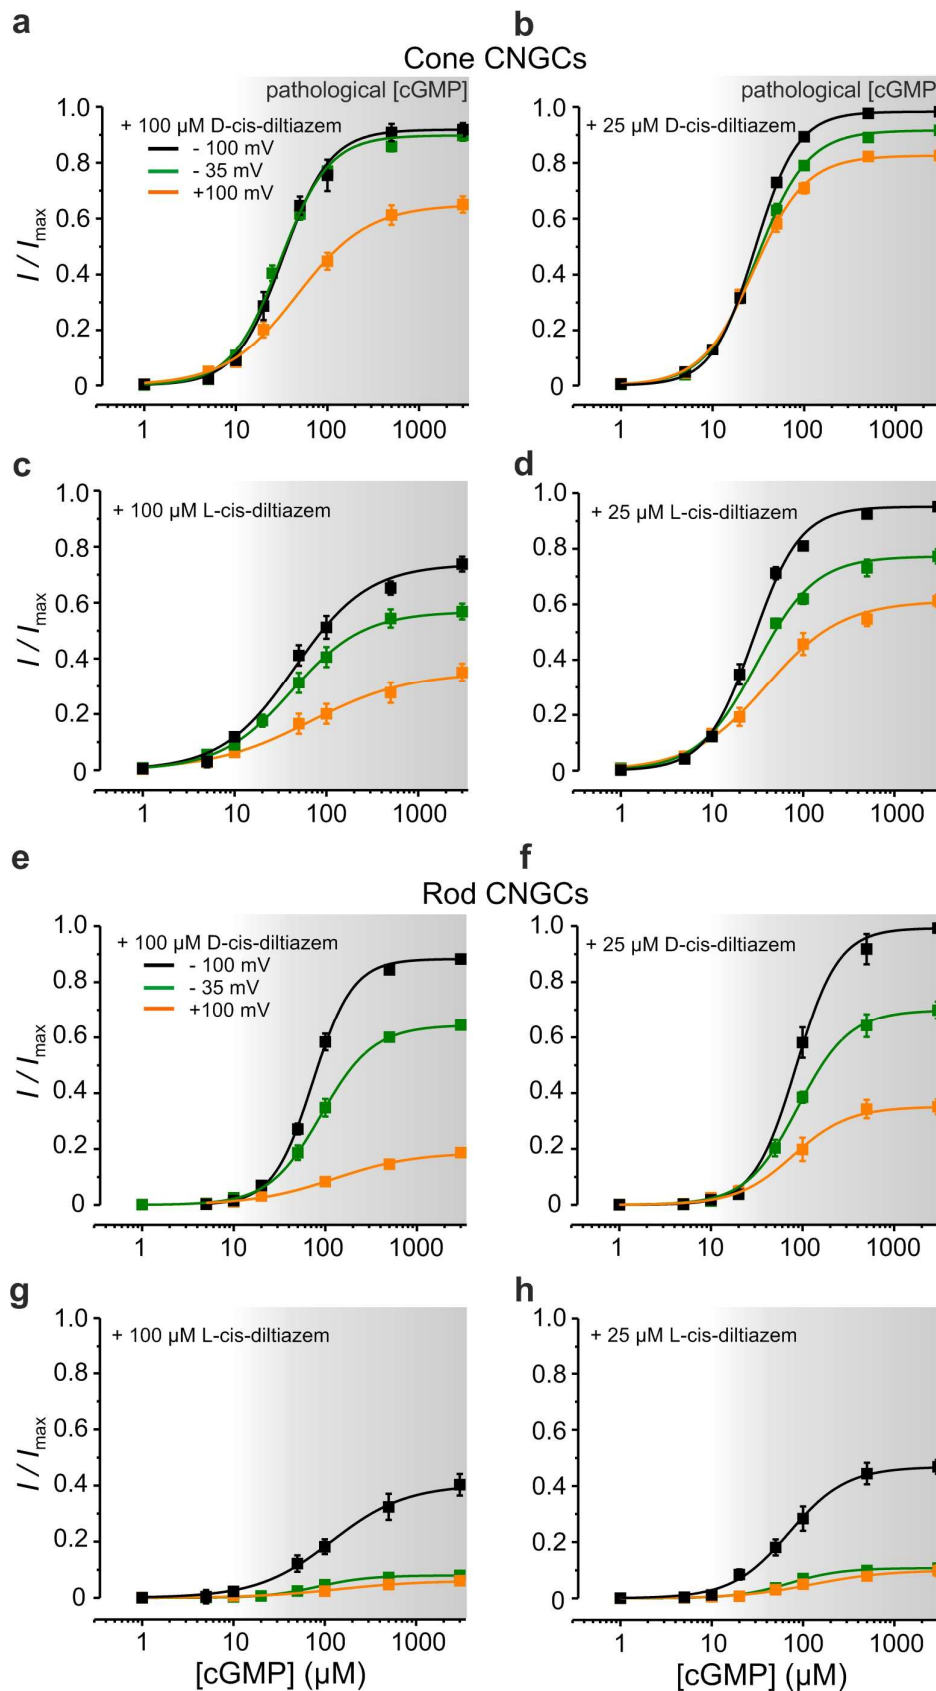

1011

1012

1013

1014

**Figure S2: Voltage dependence of D- and L-cis-diltiazem-induced inhibition of photoreceptor CNGCs.** cGMP-dependent concentration-activation relationships for cone (a - d) and rod (e - h) CNGCs in the presence of 100  $\mu\text{M}$  (left) and 25  $\mu\text{M}$  (right)

1015 D- and L-cis-diltiazem, respectively, measured at: -100 mV (black symbols), -35 mV  
 1016 (green symbols) and +100 mV (orange symbols). The current amplitudes were  
 1017 normalized with respect to the saturating currents measured in the absence of diltiazem  
 1018 at each individual voltage. The experimental data points were fitted with the Hill  
 1019 equation (Eq. 1). All parameters obtained from the fits are included in Table S1.

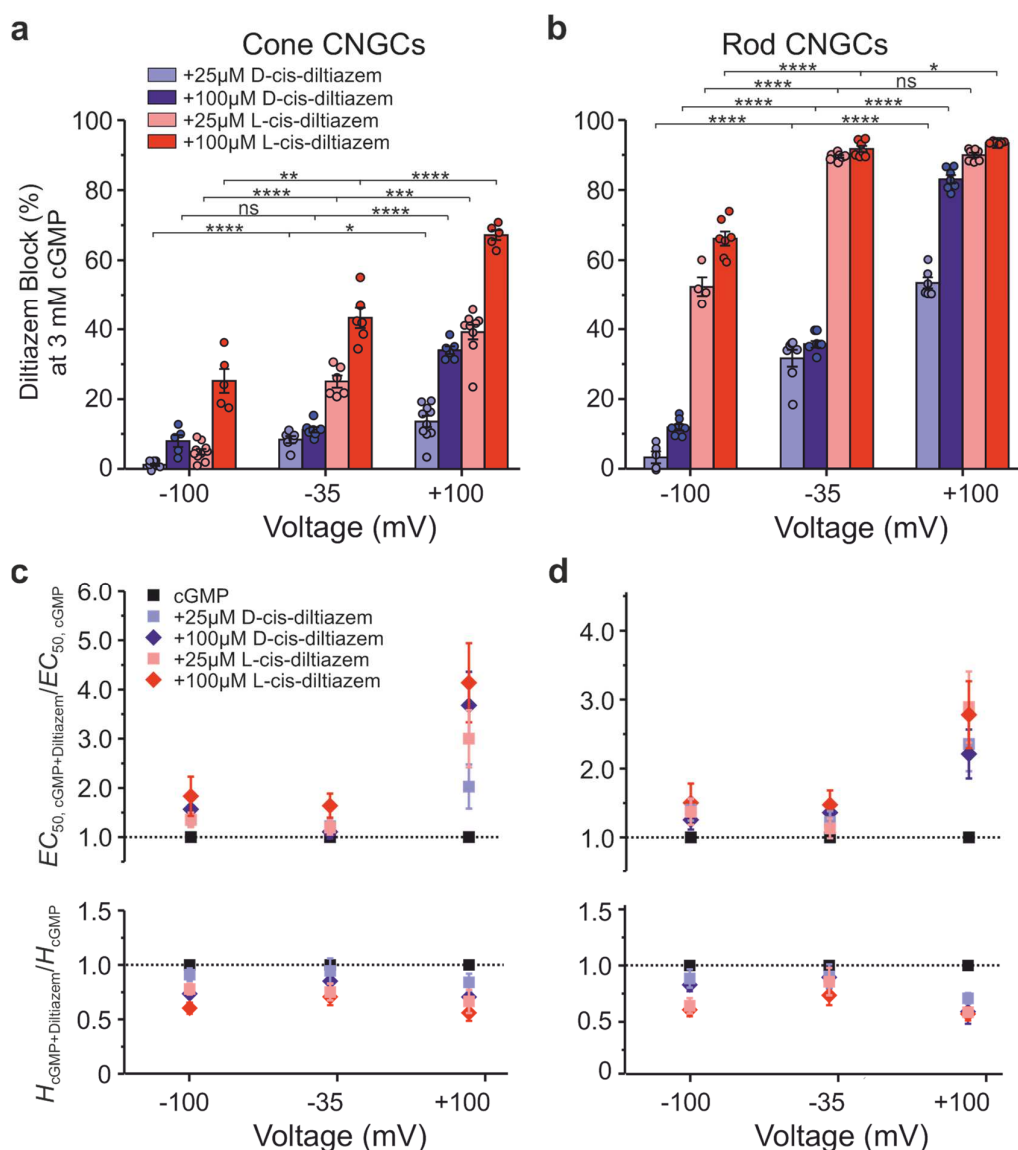

1020  
 1021  
 1022

1023 **Figure S3: Differential effect of D-cis- and L-cis-diltiazem on CNGC activity and**  
 1024 **apparent affinity. (a, b)** D- and L-cis-diltiazem - block of cone and rod CNGC activity  
 1025 triggered by saturating cGMP at three different voltages. The amount of diltiazem block  
 1026 was calculated using Eq. 2. **(c, d)** Effect of D- and L-cis-diltiazem on the channel's  
 1027 apparent affinity. Shown are the  $EC_{50,cGMP+Diltiazem}/EC_{50,cGMP-}$  and  $H_{cGMP+Diltiazem}/H_{cGMP-}$   
 1028 ratios in the presence of 25  $\mu$ M or 100  $\mu$ M D- or L-cis-Diltiazem at -100 mV, -35 mV  
 1029 and +100 mV. The  $EC_{50}$ - and  $H$ -values were obtained from the concentration-activation  
 1030 relationships shown in Figs. 1 and S2 (see also Table S1). For statistical analysis see  
 1031 Table S3.

1032

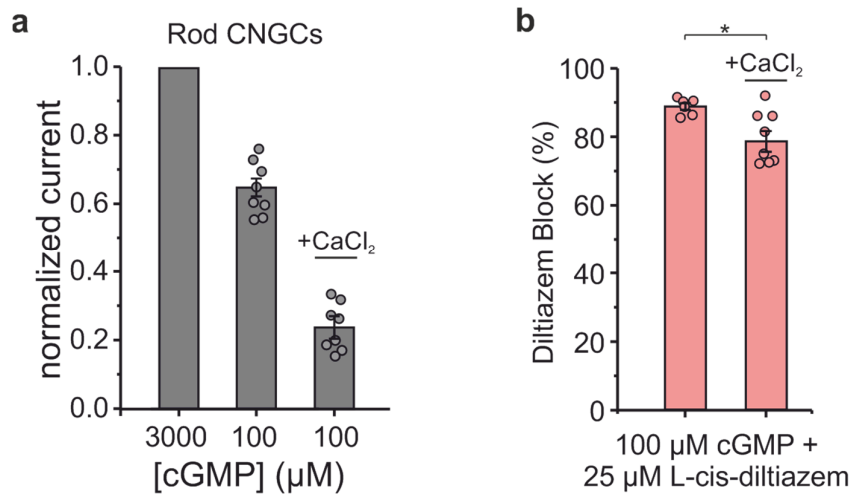

1033

1034 **Figure S4: Effect of Ca<sup>2+</sup> on the blocking effect of L-cis-diltiazem on rod CNGCs.**  
 1035 (a) The diagram shows normalized rod CNGCs current triggered by 100  $\mu\text{M}$  cGMP, in  
 1036 the absence and in the presence of 1 mM CaCl<sub>2</sub> in the extracellular solution. The  
 1037 current at 100  $\mu\text{M}$  was normalized with respect to the current in the presence of 3 mM  
 1038 cGMP, under the respective CaCl<sub>2</sub>-conditions (n=9). The channel response to cGMP is  
 1039 much weaker in the presence of Ca<sup>2+</sup> ( $I_{\text{cGMP}+\text{CaCl}_2}/I_{\text{max}} = 0.233 \pm 0.03$ ) as it is in its  
 1040 absence ( $I/I_{\text{max}} = 0.65 \pm 0.026$ ). (b) L-cis-diltiazem - block of rod CNGC activity triggered  
 1041 by 100  $\mu\text{M}$  cGMP in either the presence or absence of Ca<sup>2+</sup>. The amount of diltiazem  
 1042 block was calculated using Eq. 2. The two-tailed unpaired Student *t*-test was used for  
 1043 the statistical analysis:  $p = 0.034$ .

1044

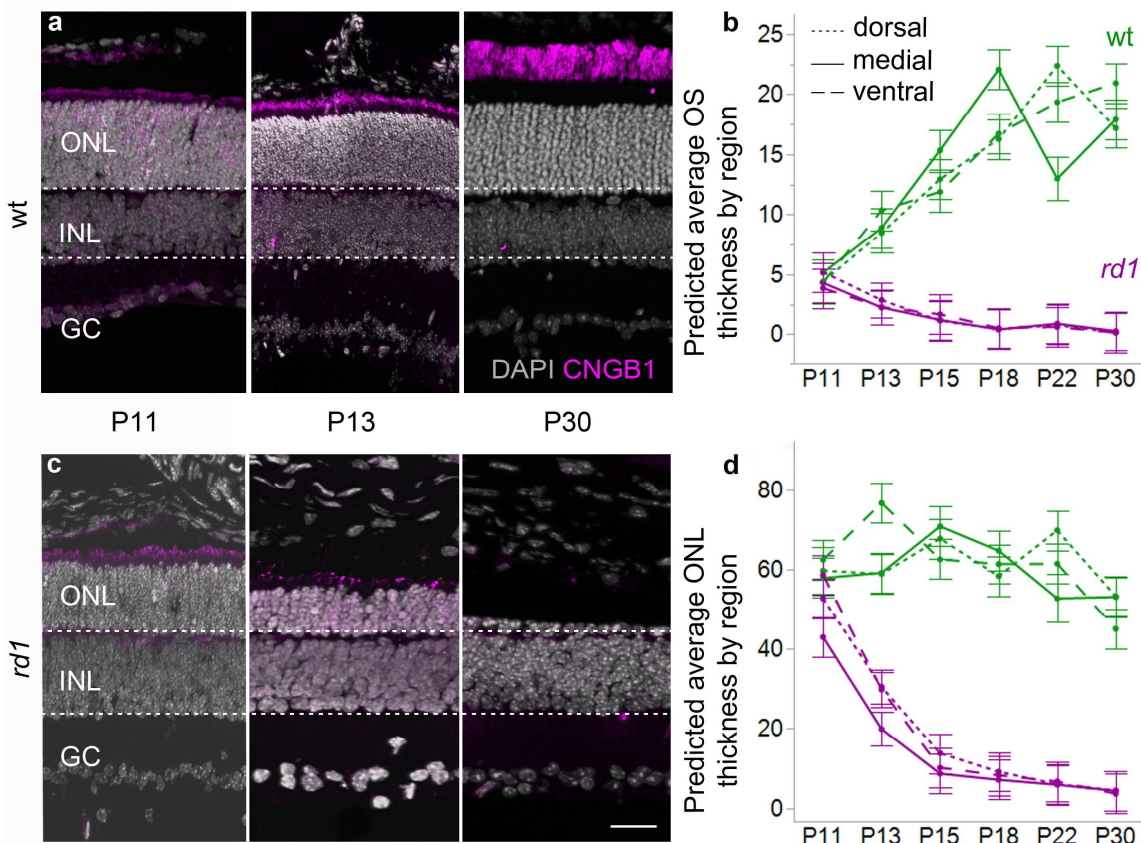

1045



1046 **Figure S5: ONL thickness and CNGC expression during *rd1* retinal degeneration.**  
 1047 Immunostaining for CNGB1a (magenta) was performed at different post-natal (P) days  
 1048 in wild-type (wt) and *rd1* retina (a,c). The nuclear counterstain (DAPI, grey) indicates  
 1049 outer nuclear layer (ONL), inner nuclear layer (INL), and ganglion cell layer (GC).  
 1050 Dotted, solid and dashed lines in the graph represent dorsal, medial, and ventral  
 1051 mouse retina respectively (b,d). **(a)** In wt retina, CNGB1a immunostaining labelled the  
 1052 photoreceptor outer segments, which grew longer from P11 to P30. **(c)** In *rd1* retina,  
 1053 CNGB1a positive outer segments were visible at P11 and P13 but essentially  
 1054 disappeared by P30. **(d)** The thickness of the ONL in wt retina (green) remained  
 1055 approx. constant between P11 and P30, while *rd1* (magenta) ONL size rapidly  
 1056 diminished after P11. **(b)** Outer segments in wt retina grew longer from P11 to P24 until  
 1057 reaching a plateau at a length of approx. 20  $\mu\text{m}$ . In contrast, *rd1* outer segments, while  
 1058 still comparable to wt at P11, had decreased in length to nearly 0  $\mu\text{m}$  by P24. Images  
 1059 and quantification were obtained from retinal sections from 4-5 different animals per  
 1060 time-point and genotype. Scale bar = 30  $\mu\text{m}$ .

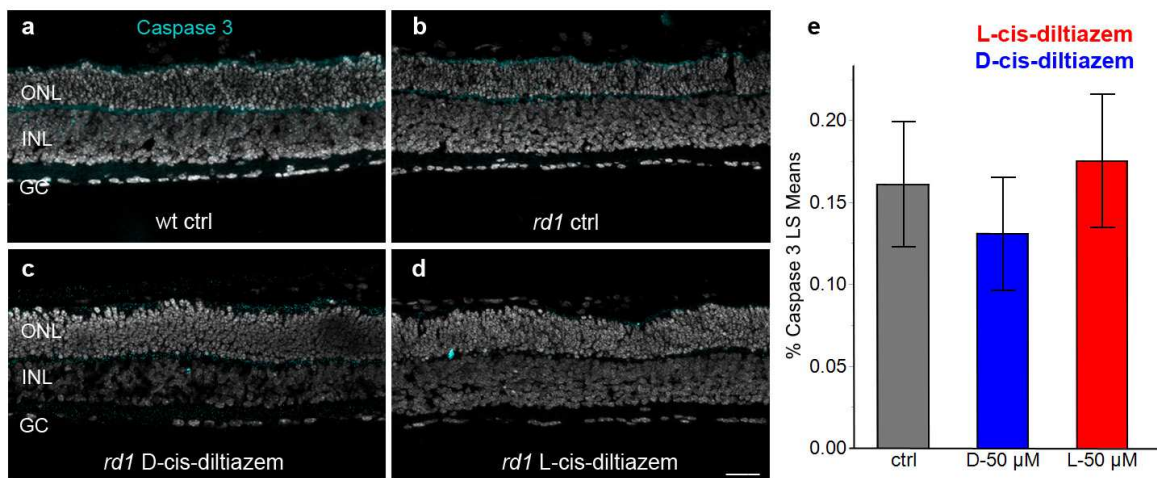

1061

1062 **Figure S6: Absence of apoptotic marker during photoreceptor degeneration.**  
 1063 Immunostaining for cleaved, activated caspase-3 (turquoise) was performed on *rd1*  
 1064 retinal sections treated with D- and L-cis-diltiazem (50  $\mu\text{M}$ ). While caspase-3  
 1065 immunoreactivity was occasionally found in both outer and inner nuclear layer (ONL,  
 1066 INL), the percentage of caspase-3 positive cells was far lower than the numbers of  
 1067 dying cells (*cf.* Fig. 6). Scale bar = 50  $\mu\text{m}$ .

1068

1069

### Supplementary Tables

| mV   | cone CNGC              |                   |    |                                    |                    |   |                                    |                    |   |                                   |                    |    |                                    |                    |   |
|------|------------------------|-------------------|----|------------------------------------|--------------------|---|------------------------------------|--------------------|---|-----------------------------------|--------------------|----|------------------------------------|--------------------|---|
|      | cGMP ( $\mu\text{M}$ ) |                   |    | + 25 $\mu\text{M}$ D-cis-diltiazem |                    |   | +100 $\mu\text{M}$ D-cis-diltiazem |                    |   | +25 $\mu\text{M}$ L-cis-diltiazem |                    |    | +100 $\mu\text{M}$ L-cis-diltiazem |                    |   |
|      | $EC_{50}$              | H                 | n  | $EC_{50}$                          | H                  | n | $EC_{50}$                          | H                  | n | $EC_{50}$                         | H                  | n  | $EC_{50}$                          | H                  | n |
| -35  | 26.0<br>$\pm 2.9$      | 1.81<br>$\pm 0.1$ | 7  | 31.7<br>$\pm 1.6$                  | 1.71<br>$\pm 0.1$  | 6 | 28.8<br>$\pm 1.4$                  | 1.54<br>$\pm 0.1$  | 7 | 31.1<br>$\pm 1.1$                 | 1.36<br>$\pm 0.09$ | 5  | 42.6<br>$\pm 4.0$                  | 1.28<br>$\pm 0.1$  | 6 |
| -100 | 20.7<br>$\pm 2.1$      | 2.12<br>$\pm 0.1$ | 9  | 28.0<br>$\pm 0.6$                  | 1.93<br>$\pm 0.08$ | 8 | 32.5<br>$\pm 3.0$                  | 1.56<br>$\pm 0.1$  | 5 | 28.0<br>$\pm 1.2$                 | 1.65<br>$\pm 0.07$ | 10 | 47.8<br>$\pm 6.6$                  | 1.13<br>$\pm 0.09$ | 5 |
| +100 | 13.5<br>$\pm 3.2$      | 1.70<br>$\pm 0.1$ | 5  | 27.5<br>$\pm 1.7$                  | 1.43<br>$\pm 0.1$  | 7 | 49.9<br>$\pm 6.0$                  | 1.20<br>$\pm 0.05$ | 5 | 40.6<br>$\pm 4.9$                 | 1.13<br>$\pm 0.1$  | 9  | 56.1<br>$\pm 9.9$                  | 0.95<br>$\pm 0.1$  | 5 |
| -35  | rod CNGC               |                   |    |                                    |                    |   |                                    |                    |   |                                   |                    |    |                                    |                    |   |
|      | 70.1<br>$\pm 5.3$      | 1.74<br>$\pm 0.1$ | 7  | 85.7<br>$\pm 8.8$                  | 1.71<br>$\pm 0.1$  | 7 | 95.4<br>$\pm 9.2$                  | 1.68<br>$\pm 0.1$  | 6 | 79.2<br>$\pm 8.1$                 | 1.49<br>$\pm 0.2$  | 5  | 103.2<br>$\pm 12.4$                | 1.28<br>$\pm 0.1$  | 6 |
|      | 61.5<br>$\pm 5.3$      | 1.98<br>$\pm 0.1$ | 10 | 86.3<br>$\pm 6.4$                  | 1.93<br>$\pm 0.08$ | 5 | 77.2<br>$\pm 5.5$                  | 1.84<br>$\pm 0.08$ | 7 | 84.3<br>$\pm 8.8$                 | 1.27<br>$\pm 0.1$  | 5  | 92.4<br>$\pm 15.2$                 | 1.20<br>$\pm 0.1$  | 6 |

|      |              |               |    |                |              |   |               |              |   |                |               |   |                |              |   |
|------|--------------|---------------|----|----------------|--------------|---|---------------|--------------|---|----------------|---------------|---|----------------|--------------|---|
| +100 | 46.5<br>±6.5 | 2.02±<br>0.07 | 10 | 109.5<br>±10.0 | 1.43<br>±0.1 | 6 | 102.8<br>±7.9 | 1.19<br>±0.2 | 6 | 134.5<br>±14.8 | 1.18<br>±0.06 | 5 | 129.3<br>±13.3 | 1.15<br>±0.1 | 6 |
|------|--------------|---------------|----|----------------|--------------|---|---------------|--------------|---|----------------|---------------|---|----------------|--------------|---|

1070

1071 **Table S1: Effect of D- and L-cis-diltiazem on the apparent affinity of rod and cone CNGCs.** The  $EC_{50}$ -values and Hill coefficients ( $H$ ,  $\pm$ SEM) were obtained from the fit of  
 1072 the respective concentrations-activation relationships ( $n$  = number of experiments).  
 1073 Two-tailed unpaired Student  $t$ -test was used to compare the  $EC_{50}$ - and  $H$ -values in the  
 1074 presence of diltiazem with the ones obtained in its absence.  
 1075

| mV   | Diltiazem Block (%) of cone CNGC at 3 mM cGMP       |                                  |                |                                 |                                  |                |        |
|------|-----------------------------------------------------|----------------------------------|----------------|---------------------------------|----------------------------------|----------------|--------|
|      | + 25 $\mu$ M<br>D-cis-diltiazem                     | + 100 $\mu$ M<br>D-cis-diltiazem | $p$ -value     | + 25 $\mu$ M<br>L-cis-diltiazem | + 100 $\mu$ M<br>L-cis-diltiazem | $p$ -value     |        |
| -35  | 8.37 $\pm$ 0.97                                     | 11.2 $\pm$ 1.1                   | 0.0378         | 25.0 $\pm$ 1.6                  | 43.2 $\pm$ 2.8                   | 0.0002         |        |
| -100 | 1.20 $\pm$ 0.3                                      | 8.02 $\pm$ 1.7                   | 0.0001         | 4.9 $\pm$ 0.8                   | 25.3 $\pm$ 3.4                   | <0.0001        |        |
| +100 | 13.5 $\pm$ 1.6                                      | 34.0 $\pm$ 1.1                   | <0.0001        | 39.2 $\pm$ 2.2                  | 67.2 $\pm$ 1.4                   | <0.0001        |        |
| mV   | Diltiazem Block (%) of rod CNGC at 3 mM cGMP        |                                  |                |                                 |                                  |                |        |
|      | -35                                                 | 31.5 $\pm$ 2.3                   | 35.6 $\pm$ 0.9 | ns                              | 89.2 $\pm$ 0.37                  | 91.5 $\pm$ 0.8 | 0.0270 |
|      | -100                                                | 3.26 $\pm$ 1.7                   | 11.9 $\pm$ 0.9 | 0.0006                          | 52.4 $\pm$ 2.7                   | 66.2 $\pm$ 2.0 | 0.0025 |
|      | +100                                                | 53.5 $\pm$ 1.6                   | 83.1 $\pm$ 1.2 | <0.0001                         | 90.0 $\pm$ 0.65                  | 93.5 $\pm$ 1.4 | 0.0004 |
| mV   | Diltiazem Block (%) of rod CNGC at 100 $\mu$ M cGMP |                                  |                |                                 |                                  |                |        |
|      | -35                                                 | 40.4 $\pm$ 3.4                   | 46.1 $\pm$ 5.3 | ns                              | 88.4 $\pm$ 1.1                   | 93.5 $\pm$ 1.1 | 0.0021 |

1076

1077 **Table S2: Effect of D- and L-cis-diltiazem on the current amplitude of rod and cone CNGCs.** The amount of block was determined by comparing the CNGC currents  
 1078 in the presence and in the absence of either D- or L-cis-diltiazem ( $\pm$ SEM,  $n=5-10$ ) and  
 1079 was calculated using Eq. 2. The comparison between 25 and 100  $\mu$ M of D- and L-cis-  
 1080 diltiazem, respectively, was performed using the two-tailed unpaired Student's  $t$ -test.  
 1081

1082

| mV   | cone CNGC:                           |         |                                       |         |                                      |         |                                       |         |
|------|--------------------------------------|---------|---------------------------------------|---------|--------------------------------------|---------|---------------------------------------|---------|
|      | cGMP + 25 $\mu$ M<br>D-cis-diltiazem |         | cGMP + 100 $\mu$ M<br>D-cis-diltiazem |         | cGMP + 25 $\mu$ M<br>L-cis-diltiazem |         | cGMP + 100 $\mu$ M<br>L-cis-diltiazem |         |
|      | $EC_{50}$                            | $H$     | $EC_{50}$                             | $H$     | $EC_{50}$                            | $H$     | $EC_{50}$                             | $H$     |
| -35  | 0.04242                              | ns      | ns                                    | ns      | ns                                   | 0.00677 | 0.00277                               | 0.00295 |
| -100 | 0.00042                              | ns      | 0.000527                              | 0.00934 | 0.000291                             | 0.00121 | 0.000153                              | <0.0001 |
| +100 | 0.000151                             | ns      | 0.00103                               | 0.01494 | 0.00222                              | ns      | 0.01297                               | 0.00636 |
| mV   | rod CNGC:                            |         |                                       |         |                                      |         |                                       |         |
|      | cGMP + 25 $\mu$ M<br>D-cis-diltiazem |         | cGMP + 100 $\mu$ M<br>D-cis-diltiazem |         | cGMP + 25 $\mu$ M<br>L-cis-diltiazem |         | cGMP + 100 $\mu$ M<br>L-cis-diltiazem |         |
|      | $EC_{50}$                            | $H$     | $EC_{50}$                             | $H$     | $EC_{50}$                            | $H$     | $EC_{50}$                             | $H$     |
|      | -35                                  | ns      | ns                                    | 0.02422 | ns                                   | ns      | ns                                    | 0.02159 |
| -100 | 0.00534                              | ns      | 0.04734                               | ns      | 0.01729                              | 0.00055 | ns                                    | 0.00012 |
| +100 | <0.0001                              | <0.0001 | <0.0001                               | <0.0001 | <0.0001                              | <0.0001 | <0.0001                               | <0.0001 |

1083

1084 **Table S3: Statistical analysis of the effect of diltiazem on CNGC  $EC_{50}$ - and  $H$ -**  
 1085 **values at different voltages.** The respective parameters and number of experiments  
 1086 are listed in Table S1. The  $EC_{50}$  and  $H$ -values in the presence of cGMP only were  
 1087 compared with the respective values in presence of cGMP and diltiazem.

|                                  | cone CNGC                        |                |                     |                  |                     |                  |    |
|----------------------------------|----------------------------------|----------------|---------------------|------------------|---------------------|------------------|----|
|                                  | $\tau_{act}$ (ms)                | $p$ -value     | $\tau_{deact}$ (ms) | $p$ -value       | $\tau_{block}$ (ms) | $p$ -value       |    |
| cGMP ( $\mu$ M)                  | 6.8 $\pm$ 2.3                    | -              | 48.2 $\pm$ 17.0     | -                | -                   | -                |    |
| + 100 $\mu$ M<br>D-cis-diltiazem | 7.5 $\pm$ 2.6                    | ns             | 103.6 $\pm$ 39.1    | 0.0009           | 154.4 $\pm$ 53.4    | ns               |    |
| + 100 $\mu$ M<br>L-cis-diltiazem | 7.9 $\pm$ 2.8                    | ns             | 94.7 $\pm$ 36.8     | 0.0032           | 120.4 $\pm$ 38.5    |                  |    |
|                                  | rod CNGC                         |                |                     |                  |                     |                  |    |
|                                  | cGMP ( $\mu$ M)                  | 7.6 $\pm$ 2.1  | -                   | 52.1 $\pm$ 18.2  | -                   | -                |    |
|                                  | + 100 $\mu$ M<br>D-cis-diltiazem | 9.8 $\pm$ 2.6  | ns                  | 81.2 $\pm$ 30.5  | 0.0315              | 139.7 $\pm$ 60.2 | ns |
|                                  | + 100 $\mu$ M<br>L-cis-diltiazem | 12.2 $\pm$ 4.1 | ns                  | 123.4 $\pm$ 46.1 | 0.0010              | 150.0 $\pm$ 56.7 |    |

1088

1089 **Table S4: Effect of D- and L-cis-diltiazem on the gating kinetics of cone and rod**  
1090 **CNGCs.** The effect of diltiazem on activation- and deactivation- time constants ( $\tau_{act}$ ,  
1091  $\tau_{deact}$  and  $\tau_{block}$ ) in the presence of 3 mM cGMP (ms,  $\pm$ SEM, n=5-9). Two-tailed unpaired  
1092 Student *t*-test was used for the comparison between time constants obtained in the  
1093 presence and in the absence of diltiazem.

1094

| Component                                            | <i>p</i> -value | Effect-Size | ES-Lower-CI | ES-Upper-CI |
|------------------------------------------------------|-----------------|-------------|-------------|-------------|
| Model (all components)                               |                 | 0.368       | 0.319       | 0.422       |
| AUC (control)                                        | <0.0001         | 0.195       | 0.147       | 0.247       |
| Treatment (drug)                                     | 0.00123         | 0.05        | 0.023       | 0.085       |
| Treatment (concentration)                            | 0.3416          | 0.039       | 0.016       | 0.072       |
| AUC (control) x treatment (drug)                     | 0.119           | 0.003       | 0           | 0.017       |
| AUC (control) x treatment (conc.)                    | 0.171           | 0.002       | 0           | 0.015       |
| AUC (control) x treatment (drug) x treatment (conc.) | <0.0001         | 0.021       | 0.005       | 0.047       |

1095

1096 **Table S5: Effect of D- and L-cis-diltiazem on light-evoked Ca<sup>2+</sup> signals in wt cone**  
1097 **photoreceptors.** The linear modelling identified the variables that significantly predict  
1098 the data. The area-under-the-curve (AUC) in the control condition was significant and  
1099 had the largest effect size, with semi-partial R-squared (SPRS) equal to 0.195  
1100 ( $p < 0.0001$ ). The drug treatment and the drug concentration were both significant.  
1101 There was also a statistically significant interaction between the AUC in the control  
1102 condition, the drug treatment, and the drug concentration. Since their confidence  
1103 intervals overlap, we cannot state which of these model components had the greatest  
1104 effect size. There was neither a significant interaction between the AUC in the control  
1105 condition and the drug treatment, nor between the AUC in the control condition and the  
1106 drug concentration. (*cf.* Fig. 4).

1107

| Fixed effect                             | OS length<br>n = 109, R <sup>2</sup> <sub>adj.</sub> = 0.96 |          | ONL thickness<br>n = 109, R <sup>2</sup> <sub>adj.</sub> = 0.93 |          |
|------------------------------------------|-------------------------------------------------------------|----------|-----------------------------------------------------------------|----------|
|                                          | F-statistic                                                 | p-value  | F-statistic                                                     | p-value  |
| genotype                                 | F(1, 25.25) = 0.0078                                        | 0.9304   | F(1, 25.99) = 2.6450                                            | 0.1159   |
| Time-point                               | F(5, 24.7) = 4.4213                                         | 0.0052   | F(5, 24.77) = 15.1946                                           | < 0.0001 |
| Retinal position                         | F(2, 48.36) = 0.2982                                        | 0.7435   | F(2, 49.39) = 2.9380                                            | 0.0623   |
| genotype x time-point                    | F(5, 24.7) = 13.2699                                        | < 0.0001 | F(5, 24.77) = 12.0885                                           | < 0.0001 |
| genotype x retinal position              | F(2, 48.36) = 0.3245                                        | 0.7245   | F(2, 49.39) = 0.9156                                            | 0.4070   |
| timepoint x retinal position             | F(10, 47.94) = 3.8401                                       | 0.0007   | F(10, 48.41) = 2.0258                                           | 0.0508   |
| genotype x time-point x retinal position | F(10, 47.94) = 4.2248                                       | 0.0003   | F(10, 48.41) = 1.3344                                           | 0.2397   |

1108

1109 **Table S6: Analysis of the variability of OS length and ONL thickness in *rd1* and**  
 1110 **wt.** Results of the linear mixed-effects models with the dependent variables OS length  
 1111 and ONL thickness. The models' residuals followed a normal distribution, while the  
 1112 Brown-Forsythe test indicated a violation of the assumption of homoscedasticity for  
 1113 both models. However, linear mixed-effects models estimates have been shown to be  
 1114 robust against such violations (79).

1115

| Dependent variable     | Genotype                                                                     | Fixed effect               | Normality of residuals | Homo-scedasticity | F-statistic           | p-value  |
|------------------------|------------------------------------------------------------------------------|----------------------------|------------------------|-------------------|-----------------------|----------|
| TUNEL                  | wt (35)<br>R <sup>2</sup> <sub>adj.</sub> = .80<br>n = 336                   | Concentration <sup>1</sup> | Yes                    | No                | F(3, 17.92) = 20.7656 | <0.0001  |
|                        |                                                                              | Treatment                  |                        |                   | F(1, 303.74) = 0.171  | 0.6795   |
|                        |                                                                              | Concentration x Treatment  |                        |                   | F(3, 22.8) = 29.6038  | <0.0001  |
|                        | <i>rd1</i> (36)<br>R <sup>2</sup> <sub>adj.</sub> = .88<br>n = 331           | Concentration <sup>1</sup> | Yes                    | No                | F(3, 24.82) = 37.8570 | < 0.0001 |
|                        |                                                                              | Treatment                  |                        |                   | F(1, 306.63) = 0.0787 | 0.7792   |
|                        |                                                                              | Concentration x Treatment  |                        |                   | F(3, 27.75) = 31.0649 | <0.0001  |
|                        | <i>rd10</i> (10)<br>R <sup>2</sup> <sub>adj.</sub> = .84<br>n = 112          | Concentration <sup>4</sup> | Yes                    | No                | F(1, 8.11) = 25.9134  | <0.0009  |
|                        |                                                                              | Treatment                  |                        |                   | F(1, 100.96) = 0.0026 | 0.9598   |
|                        |                                                                              | Concentration x Treatment  |                        |                   | F(1, 10.43) = 23.5461 | <0.0006  |
| Calpain activity       | wt (11) & <i>rd1</i> (11)<br>R <sup>2</sup> <sub>adj.</sub> = .86<br>n = 143 | Concentration <sup>4</sup> | Yes                    | No                | F(1, 16.41) = 99.2752 | <0.0001  |
|                        |                                                                              | Treatment                  |                        |                   | F(2, 16.41) = 0.793   | 0.4691   |
|                        |                                                                              | Concentration x Treatment  |                        |                   | F(2, 16.41) = 2.055   | 0.1598   |
| Calpain-2              | wt (9) & <i>rd1</i> (9)<br>R <sup>2</sup> <sub>adj.</sub> = .83<br>n = 117   | Genotype                   | Yes                    | No                | F(1, 12.14) = 9.0927  | 0.0106   |
|                        |                                                                              | Treatment                  |                        |                   | F(2, 12.14) = 20.2775 | 0.0001   |
|                        |                                                                              | Genotype x Treatment       |                        |                   | F(2, 12.14) = 2.2535  | 0.1471   |
| Caspase-3              | <i>rd1</i> (11)<br>R <sup>2</sup> <sub>adj.</sub> = .04<br>n = 58            | Treatment                  | Yes                    | Yes               | F(2, 7.15) = 0.3799   | 0.6970   |
| ONL localisation TUNEL | <i>rd1</i> (9)<br>R <sup>2</sup> <sub>adj.</sub> = .72<br>n = 53             | Treatment                  | Yes                    | No                | F(2, 10.11) = 49.4033 | <0.0001  |

Treatment: {D-cis-diltiazem, L-cis-diltiazem}, <sup>1</sup>{0, 25, 50, 100 μM}, <sup>2</sup>{0, 25 μM}, <sup>3</sup>{0, 50 μM}, <sup>4</sup>{0, 100 μM}

1116

1117 **Table S7: Analysis of cell death markers using linear mixed-effects models.**  
 1118 Shown are the effects that explain the variability of the dependent variables TUNEL,  
 1119 calpain activity, calpain-2 positive cells, as well as localization of TUNEL positive cells  
 1120 within the ONL. All models included the animal as a random effect to account for  
 1121 repeated measures. Numbers in brackets indicate the total number of animals used per  
 1122 genotype, n represents the number of observations used in the model. Normality of  
 1123 residuals was assessed visually; heterogeneity of residual variances  
 1124 (homoscedasticity) was tested with the Brown-Forsythe test. Linear mixed-effects

1125 models have been shown to be robust against violations of model assumptions.

1126

|                                           | Contrast<br>LS means<br>[95% confidence interval] (%) |                                                       | LS means<br>diff. ± SE (%) | F-statistic            | p-value  |
|-------------------------------------------|-------------------------------------------------------|-------------------------------------------------------|----------------------------|------------------------|----------|
| <b>ONL<br/>localisation<br/>TUNEL</b>     | <i>rd1</i> ctrl<br>59.98<br>[54.04, 65.92]            | <i>rd1</i> D-25 µM<br>57.44<br>[52.05, 62.83]         | 2.54 ± 3.79                | F(1, 16.33) = 0.4511   | 0.5112   |
|                                           |                                                       | <i>rd1</i> L-25 µM<br>85.03<br>[79.70, 90.36]         | 25.05 ± 3.40               | F(1, 10.42) = 54.2025  | < 0.0001 |
| <b>Calpain-2</b>                          | <i>rd1</i> ctrl<br>1.82<br>[1.20, 2.44]               | <i>rd1</i> D-50 µM<br>0.68<br>[0.07, 1.30]            | 1.13 ± 0.40                | F(1, 12.52) = 7.9008   | 0.0152   |
|                                           |                                                       | <i>rd1</i> L-50 µM<br>2.73<br>[2.11, 3.35]            | 0.91 ± 0.40                | F(1, 12.69) = 5.0979   | 0.0423   |
|                                           | wt ctrl<br>0.52<br>[0.09, 1.13]                       | wt L-50 µM<br>2.04<br>[1.43, 2.66]                    | 1.52 ± 0.39                | F(1, 11.87) = 14.7372  | 0.0024   |
| <b>TUNEL</b>                              | <i>rd1</i> ctrl<br>98.10<br>[50.88, 145.32]           | <i>rd1</i> D-100 µM<br>180.85<br>[111.06, 250.63]     | 82.75 ± 41.14              | F(1, 28.11) = 4.0454   | 0.0540   |
|                                           | <i>rd1</i> ctrl<br>101.96<br>[54.54, 149.38]          | <i>rd1</i> L-100 µM<br>661.96<br>[593.66, 730.26]     | 560.00 ± 40.99             | F(1, 26.68) = 191.1994 | <0.0001  |
|                                           | <i>rd10</i> ctrl<br>90.68<br>[201.44, 382.81]         | <i>rd10</i> D-100 µM<br>401.33<br>[111.58, 691.07]    | 310.60 ± 178.75            | F(1, 8.10) = 3.0200    | 0.1200   |
|                                           | <i>rd10</i> ctrl<br>93.60<br>[198.61, 385.80]         | <i>rd10</i> L-100 µM<br>1403.14<br>[1060.80, 1745.48] | 1310.00 ± 199.71           | F(1, 9.25) = 42.9966   | <0.0001  |
|                                           | wt ctrl<br>105.35<br>[58.38, 152.32]                  | wt D-100 µM<br>112.44<br>[43.49, 181.39]              | 7.10 ± 39.87               | F(1, 19.17) = 0.0316   | 0.8607   |
|                                           | wt ctrl<br>98.28<br>[51.36, 145.21]                   | wt L-50 µM<br>458.14<br>[406.36, 509.93]              | 359.90 ± 33.31             | F(1, 18.59) = 116.6931 | <0.0001  |
| wt L-100 µM<br>420.42<br>[366.06, 474.78] |                                                       | 322.10 ± 34.59                                        | F(1, 21.63) = 86.7207      | <0.0001                |          |

1127

1128 **Table S8: Post-hoc analysis of the linear mixed-effects models.** Results of contrast  
1129 tests comparing the least-square means, which resulted from the linear mixed-effects  
1130 models shown in Table S7.

1131
